# Supplementary material for: A genomic autopsy identifies causes of perinatal death and provides options to prevent recurrence
Source: Research Square preprint supplement (doi:10.21203/rs.3.rs-1215526/v1), 2022-01-11
Supplement: Supplementary file 1 [file 2cf135b6a45184bfc07e7973.xlsx]

## Sheet: Supplementary Table 1
Supplementary table 1
				LP/P variant identified	LP/P %	VUS/GUS	VUS/GUS %	NAD	NAD %
Total probands	200			51	0.255	54	0.27	95	0.475
Male	103	0.515		20	0.194175	34	0.330097	49	0.475728
Female	97	0.485		31	0.319588	20	0.206186	46	0.474227
Classification
Terminated pregnancy	136	0.68		33	0.242647	36	0.264706	67	0.492647
Miscarriage	7	0.035		3	0.428571	1	0.142857	3	0.428571
Stillbirth	34	0.17		5	0.147059	10	0.294118	21	0.617647
Neonatal death	22	0.11		10	0.454545	6	0.272727	6	0.272727
unknown	1	0.005	PED030			1	1	0	0
	200
Reason
Multiple congenital abnormalities	128	0.64		38	0.296875	32	0.25	58	0.453125
Single congenital abnormality	51	0.255		11	0.215686	15	0.294118	25	0.490196
Unexplained	19	0.095		1	0.0526316	7	0.368421	11	0.578947
Other/unknown	2	0.01	(121, 161)	1	0.5	0	0	1	0.5
Recurrence
Isolated case for couple	155	0.775		38	0.245161	45	0.290323	72	0.464516
Recurrent for couple	38	0.19		11	0.289474	9	0.236842	18	0.473684
Recurrent for Mother	1	0.005	3 additional affecteds	0	0	0	0	1	1
Other	6	0.03		2	0.333333	0	0	4	0.666667
Testing performed
Trio	179	0.895		48	0.268156	28	0.156425	83	0.575419
Quad	21	0.105		3	0.142857	6	0.285714	12	0.571429
Major Organ system(s)	Total number	%		P/LP variant identified	P/LP %	VUS/GUS	VUS/GUS %	NAD	NAD %
Global (>3)	14	0.07		4	0.285714	4	0.285714	6	0.428571
Cardiovascular, Skeletal (2)	2	0.01		1	0.5	1	0.5	0	0
Cardiovasular, Pulmonary (2)	1	0.005		1	1	0	0	0	0
Lymphatic, Skeletal (2)	2	0.01		2	1	0	0	0	0
Muscular (incl. neuromuscular), Skeletal (2)	1	0.005		0	0	0	0	1	1
Neurological, Urogenital (2)	2	0.01		1	0.5	0	0	1	0.5
Cardiovascular	14	0.07		4	0.285714	6	0.428571	4	0.285714
Connective tissue and skin	2	0.01		0	0	1	0.5	1	0.5
Gastrointestinal	2	0.01		0	0	1	0.5	1	0.5
Haematopoietic and immune	6	0.03		3	0.5	2	0.333333	1	0.166667
Lymphatic	7	0.035		1	0.142857	2	0.285714	4	0.571429
Metabolic and Endocrine	3	0.015		2	0.666667	0	0	1	0.333333
Muscular incl. neuromuscular	7	0.035		3	0.428571	1	0.142857	3	0.428571
Neurological	60	0.3		12	0.2	17	0.283333	31	0.516667
Other	8	0.04		2	0.25	2	0.25	4	0.5
Respiratory	6	0.03		1	0.166667	4	0.666667	1	0.166667
Skeletal	21	0.105		6	0.285714	6	0.285714	9	0.428571
Urogenital	30	0.15		7	0.233333	4	0.133333	19	0.633333
No Abnormality	12	0.06		1	0.0833333	3	0.25	8	0.666667
	200			51		54		95

## Sheet: Supplementary Table 2
Pedigree ID	Sex of proband	Family structure tested	Classification	Consanguinity	Relatedness Coefficient	Gestation at delivery (weeks)	Age at death (days)	Reason for referral	Family history	number of affected family members	Proband - Major organ system(s) affected	Proband - Major phenotypes (HPO-terms) observed	Diagnostic Status	Inheritance	Gene symbol	Amino acid change(s)	Described phenotype for genetic condition (OMIM and/or literature)	Overlapping features with OMIM and/or published cases	Additional features observed in proband	Missing' features of typical cases for disorder	Contribution to phenotype	Comments	PMID for published cases and phenotypic features
PED001	Female	Trio	Neonatal death	Yes	N/A	36	1	Multiple congenital anomalies, genetic cause suspected	Recurrent for couple	1	Skeletal	Ectrodactyly, Congenital cystic adenomatoid malformation of the lung, Abnormal facial shape, Syndactyly, Oligodactyly, Pulmonary hypoplasia, Abnormal lung lobation,	Solved (LP/P in OMIM gene)	AR homozygous	FGFR2	p.Arg255Gln	Pfeiffer syndrome(MIM:101600); Crouzon syndrome (MIM:123500)	Digital abnormalities in many of these such as Pfeiffer, LADD, Apert. Some can have long bone abnoramilites (radio-ulnar synostosis), all have facial dysmorphism	Congenital cystic adenomatoid malformation of the lung, Pulmonary hypoplasia, Abnormal lung lobation	No craniosynostosis	Full, phenotype expansion, novel mode of inheritance, plausible biological explanation for new features	Published as case report	PMID:27323706
PED002	Female	Trio	Termination	Yes	0.1592	24		Single congenital anomaly, genetic cause suspected	Recurrent for couple	1	Urogenital	Polycystic kidney dysplasia,	Candidate (VUS in novel inheritance) Candidate (GUS)	AR homozygous (digenic) AR homozygous (digenic)	DNAJB11 TMEM212	c.853-10G>A p.Gly111Arg	Polycystic kidney disease 6 with or without polycystic liver disease (MIM:618061) No OMIM disease gene	Overlap			Novel - Full
PED003	Male	Quad	Neonatal death	Yes	0.04479	N/A	N/A	Unexplained neonatal death	Recurrent for couple	2	No abnormality detected		Candidate (GUS)	AR homozygous	UBR4	p.Val789Glu	No OMIM disease gene
PED004	Male	Quad	Termination	Yes	0.2636	20		Single congenital anomaly, genetic cause suspected	Recurrent for couple	1	Neurological	Agenesis of corpus callosum, Ventriculomegaly	Unresolved (NAD)
PED005	Male	Trio	Termination	No	0.009901	13		Multiple congenital anomalies, genetic cause suspected	Recurrent for couple	3	Urogenital, Neurological	Encephalocele, Omphalocele, Cystic renal dysplasia,	Solved (LP/P in OMIM gene)	AR compound heterozygous	MKS1	c.1024+1G>T/c.1408-34_1408-6del29	Meckel Syndrome 1 (MIM:249000)	Encephalocele, Omphalocele, Cystic renal dysplasia, polydactyly	nil	nil	Full
PED006	Male	Quad	Termination	Yes	0.1133	17		Single congenital anomaly, genetic cause suspected	Recurrent for couple	2	Connective tissue and skin	Cleft palate, Cleft lip	Unresolved (NAD)
PED007	Male	Trio	Neonatal death	No	0.01235	26	1	Single congenital anomaly, genetic cause suspected	Recurrent for couple	1	Lymphatic (incl. non-immune hydrops)	Hydrops fetalis, Generalized edema, Pericardial effusion, Pleural effusion, Ascites	Solved (LP/P in novel gene)	AR compound heterozygous	MDFIC	p.Met131fs*/p.Phe244Leu	No OMIM disease gene				Novel - full	Resubmitted as novel disease gene association	Resubmitted
PED008	Female	Trio	Stillbirth	No	-0.1478	39		Single congenital anomaly, genetic cause suspected	Isolated case for couple		Metabolic and Endocrine	Large for gestational age	Solved (LP/P in OMIM gene)	AD inherited (M)	ABCC8	p.Leu1543Pro	Hyperinsulinemic hypoglycemia, familial, 1 (MIM:256450)	Large of gestational age			Full
PED010	Female	Trio	Termination	No	0.01323	20		Multiple congenital anomalies, genetic cause suspected	Isolated case for couple		Neurological	Agenesis of corpus callosum, Cerebellar hypoplasia, Heterotopia	Unresolved (NAD)
PED011	Male	Trio	Termination	No	0.005482	17		Multiple congenital anomalies, genetic cause suspected	Recurrent for couple	1	Neurological	Ventriculomegaly, Hydrocephalus, Bilateral microphthalmos	Unresolved (NAD)
PED012	Male	Quad	Miscarriage	No	-0.02691	16		Multiple congenital anomalies, genetic cause suspected	Recurrent for couple	1	Skeletal	Bowing of the long bones, Short long bone, Aplasia/Hypoplasia of the sacrum, Abnormal ossification of the pubic bone, Platyspondyly, Poorly ossified cervical vertebrae, Short ribs	Solved (LP/P in OMIM gene)	AR compound heterozygous	B3GAT3	p.Arg169Trp/p.Arg225*	Multiple joint dislocations, short stature, craniofacial dysmorphism, with or without congenital heart defects (MIM:245600)	Bowing has been reported	Sacral abnormality	spatulate distal phalanges, kyphoscoliosis	Full, phenotype expansion	Published as novel phenotype association	PMID:31988067
PED013	Female	Trio	Termination	No	-0.0146	22		Multiple congenital anomalies, genetic cause suspected	Isolated case for couple		Neurological	Cerebellar vermis hypoplasia, Increased nuchal translucency	Solved (LP/P in OMIM gene)	AR compound heterozygous	PIBF1	c.954G>A (p.Val306fs*)/p.Lys353fs*	Joubert syndrome 33 (MIM:617767)	cerebellar vermis hypoplasia			Full
PED014	Female	Trio	Termination	No	-0.02175	16		Multiple congenital anomalies, genetic cause suspected	Isolated case for couple		Lymphatic, Skeletal	Fetal cystic hygroma, Short long bones, Osteopenia, Platyspondyly	Solved (LP/P in OMIM gene)	AD de novo	RIT1	p.Ala57Gly	Noonan Syndrome 8 (MIM:615355)	cystic hygroma, short long bones	platyspondyly is not usual	congenital heart disease, but not in all	Full
PED015	Male	Trio	Termination	No	-0.2441	-1		Multiple congenital anomalies, genetic cause suspected	Isolated case for couple		Urogenital	Cystic renal dysplasia, Congenital hepatic fibrosis	Unresolved (NAD)
PED016	Female	Trio	Stillbirth	No	-0.2441	39+4		Unexplained fetal death	Isolated case for couple		No abnormality detected		Unresolved (NAD)
PED017	Female	Trio	Neonatal death	No	-0.03084	40	1	Single congenital anomaly, genetic cause suspected	Isolated case for couple		Haematopoietic and immune	Anemia, Hepatic necrosis, Extramedullary hematopoiesis	Solved (LP/P in OMIM gene)	AR compound heterozygous	TPI1	p.E105D/c.544-1G>C (p.?)	Hemolytic anemia due to triosephosphate isomerase deficiency (MIM:615512)	Anemia, extrahepatic hematopoeisis	hepatic necrosis and very early death		Full, phenotype expansion
PED018	Female	Trio	Termination	No	-0.01577	20		Single congenital anomaly, genetic cause suspected	Isolated case for couple		Neurological	Agenesis of corpus callosum, Cerebellar vermis hypoplasia, Ventriculomegaly, Abnormality of the pons, Abnormality of the medulla oblongata	Solved (LP/P in OMIM gene)	AD de novo	ARID1B	p.Trp1499*	Coffin-Siris syndrome 1 (MIM:135900)	All overlap			Full		PMID:6752273
PED019	Female	Trio	Termination	No	-0.00391	18+3		Multiple congenital anomalies, genetic cause suspected	Isolated case for couple		Lymphatic (incl. non-immune hydrops)	Nonimmune hydrops fetalis, Small for gestational age, Fetal ascites, Pleural effusion, Increased nuchal translucency	Unresolved (NAD)
PED020	Male	Quad	Termination	No	-0.02976	21		Multiple congenital anomalies, genetic cause suspected	Recurrent for couple	1	Urogenital	Bilateral renal agenesis	Unresolved (NAD)
PED021	Male	Trio	Termination	No	-0.01519	22		Multiple congenital anomalies, genetic cause suspected	Isolated case for couple		Global	Pulmonary artery atresia, Overriding aorta, Aplasia/Hypoplasia of the thumb	Unresolved (NAD)
PED022	Female	Trio	Termination	No	-0.01167	22		Single congenital anomaly, genetic cause suspected	Other	1	Neurological	Dandy-Walker malformation, Aplasia/Hypoplasia of the corpus callosum, Hydrocephalus, Abnormality of neuronal migration, Periventricular gray matter heterotopia, White matter neuronal heterotopia	Unresolved (NAD)
PED023	Female	Trio	Termination	No	0.004533	22		Single congenital anomaly, genetic cause suspected	Isolated case for couple		Neurological	Agenesis of corpus callosum, Fusion of the left and right thalami, Cerebellar hypoplasia, Abnormality of hindbrain morphology, Brainstem dysplasia, Microcephaly, Abnormality of the cerebellum	Solved (LP/P in OMIM gene)	AR compound heterozygous	NDE1	p.Thr243Profs*115/p.Leu245Profs*70	Microhydranencephaly (MIM:605013); Lissencephaly 4 (with microcephaly) (MIM:614019)	All overlap		lissencephaly (too early)	Full
PED024	Male	Quad	Neonatal death	No	0.0242	35	1	Multiple congenital anomalies, genetic cause suspected	Recurrent for couple	1	Neurological	Hypoplasia of the corpus callosum, Hypoplasia of the brainstem, Abnormal globus pallidus morphology, Cerebellar hypoplasia, Abnormality of the caudate nucleus, Subependymal cysts, Cavum septum pellucidum, Pachygyria, Contractures of the large joints, Abnormal facial shape	Solved (LP/P in novel phenotype)	AR compound heterozygous	EIF2B2	c.284+5G>T (p.?)/p.Arg172*	Leukoencephalopathy with vanishing white matter (MIM:603896)	severe fetal version of this condition	severe fetal presentation		Full, phenotype expansion	Severe fetal presentation represents expansion
PED025	Male	Trio	Termination	No	0.002409	21		Multiple congenital anomalies, genetic cause suspected	Isolated case for couple		Urogenital	Bilateral renal agenesis, Abnormal vertebral morphology, Abnormality of the vasculature	Unresolved (NAD)
PED026	Male	Trio	Termination	No	0.002409	21		Multiple congenital anomalies, genetic cause suspected	Isolated case for couple		Neurological	Schizencephaly, Arthrogryposis multiplex congenita, Absence of stomach bubble on fetal sonography	Candidate (GUS)	AR compound heterozygous	KIF26A	p.Arg721Cys/p.Ala1559Val	No OMIM disease gene				Novel - full
PED027	Male	Trio	Stillbirth	No	0.009279	35		Unexplained fetal death	Isolated case for couple		No abnormality detected		Unresolved (NAD)
PED028	Female	Trio	Termination	No	-0.008206	21+3		Multiple congenital anomalies, genetic cause suspected	Isolated case for couple		Skeletal	Transposition of the great arteries, Short forearm, Aplasia/Hypoplasia of the fibula, Absent hand, Absent toe, Short tibia, Absent metatarsal bone, Abnormality of metacarpophalangeal joint, Flexion contracture of thumb,	Unresolved (NAD)
PED029	Male	Quad	Termination	Yes	0.07464	19		Multiple congenital anomalies, genetic cause suspected	Recurrent for couple	1	Skeletal	Hand polydactyly, Foot polydactyly, Short long bone, Thoracic hypoplasia, Short ribs, Ambiguous genitalia	Candidate (VUS in OMIM gene)	AR homozygous	SIK3	p.Arg393His	Spondyloepimetaphyseal dysplasia, Krakow type (MIM:618162)				Novel - full
PED030	Male	Trio	N/A	Yes	-0.0357	N/A		Multiple congenital anomalies, genetic cause suspected	Isolated case for couple		Skeletal	Casamassima-Morton-Nance syndrome	Candidate (VUS in novel phenotype)	XLR (digenic) AD de novo (digenic)	FLNA FLNC	p.Gly1706Ser p.Ala2357Val	FG syndrome 2 (MIM:300321) Cardiomyopathy, familial restrictive 5 (MIM:617047)				Uncertain
PED031	Female	Trio	Termination	No	-0.0357	19		Multiple congenital anomalies, genetic cause suspected	Isolated case for couple		Muscular (incl. neuromuscular)	Cystic hygroma, Hydrops fetalis, Contractures of the large joints, Multiple pterygia, Pulmonary hypoplasia, Cleft palate, Cortical dysplasia	Solved (LP/P in OMIM gene)	AR compound heterozygous	NEB	p.Met4377Lysfs*11/p.His6907Ilefs*11	Nemaline Myopathy 2 (MIM:256030)	most overlap	cortical dysplasia		Full, phenotyope expansion	Cortical dysplasia can be listed as phenotype expansion
PED032	Female	Trio	Stillbirth	No	-0.0156	38		Multiple congenital anomalies, genetic cause suspected	Isolated case for couple		Metabolic and Endocrine	Microcephaly, Abnormality of the adrenal glands, Abnormality of the liver, Small for gestational age	Unresolved (NAD)
PED033	Male	Trio	Miscarriage	No	-0.001647	17		Multiple congenital anomalies, genetic cause suspected	Isolated case for couple		Muscular (incl. neuromuscular)	Neck pterygia, Arthrogryposis multiplex congenita, Bilateral talipes equinovarus, Hand clenching, Finger clinodactyly	Solved (LP/P in OMIM gene)	AD de novo	NALCN	p.Leu1324Phe	Congenital contractures of the limbs and face, hypotonia, and developmental delay (MIM:616266)	All overlap			Full
PED034	Male	Trio	Termination	No	0.009519	18		Multiple congenital anomalies, genetic cause suspected	Isolated case for couple		Neurological	Aplasia of the nose, Anophthalmia, Ventriculomegaly, Cortical dysplasia, Schizencephaly	Unresolved (NAD)
PED035	Male	Trio	Termination	No	0.03838	20		Single congenital anomaly, genetic cause suspected	Isolated case for couple		Neurological	Agenesis of corpus callosum, Frontoparietal cortical dysplasia, Microcephaly	Candidate (GUS)	XLR	PLXNA3	p.Arg184His	No OMIM disease gene				Uncertain
PED036	Female	Trio	Stillbirth	No	-0.03924	36		Single congenital anomaly, genetic cause suspected	Isolated case for couple		Urogenital	Cystic renal dysplasia, Aplasia/Hypoplasia of the bladder	Unresolved (NAD)
PED037	Male	Trio	Termination	No	-0.01709	21		Multiple congenital anomalies, genetic cause suspected	Isolated case for couple		Neurological	Dilation of lateral ventricles, Cerebellar vermis hypoplasia, Choroid plexus cyst	Unresolved (NAD)
PED038	Male	Trio	Termination	No	0.005252	17		Multiple congenital anomalies, genetic cause suspected	Isolated case for couple		Cardiovascular	Cystic hygroma, Dysplastic tricuspid valve, Tricuspid regurgitation, Dilatation of the renal pelvis	Candidate (GUS)	AD de novo	KDM5A	p.Gly8Ser	No OMIM disease gene				Uncertain
PED039	Female	Trio	Termination	No	0.001356	28		Single congenital anomaly, genetic cause suspected	Other	2	Cardiovascular	Ventricular septal defect, Discordant atrioventricular connection, Hypoplasia of right ventricle, Pulmonary artery hypoplasia, Double outlet right ventricle, Dextrocardia	Unresolved (NAD)								Uncertain
PED040	Male	Trio	Termination	No	-0.01856	21+5		Single congenital anomaly, genetic cause suspected	Isolated case for couple		Neurological	Periventricular gray matter heterotopia, Ventriculomegaly, Prominent calcaneus, Wide anterior fontanel, Triangular face	Candidate (VUS in novel phenotype)	AR compound heterozygous	LAMC3	p.Arg356Cys/p.Gln909Arg	Cortical malformations, occipital (MIM:614115)	All overlap	heterotopia not described before		Full, phenotype expansion	Published as case report	PMID:33639934
PED041	Female	Trio	Miscarriage	No	0.01869	16		Multiple congenital anomalies, genetic cause suspected	Recurrent for couple	1	Neurological	Agenesis of corpus callosum, Cerebellar malformation, Abnormality of the pons, Abnormality of midbrain morphology	Unresolved (NAD)
PED042	Male	Trio	Termination	Yes	0.07799	18		Multiple congenital anomalies, genetic cause suspected	Recurrent for couple	1	Skeletal	Mesomelic/rhizomelic limb shortening, Skeletal dysplasia, Midface retrusion, Camptodactyly, Bell-shaped thorax, Equinovarus deformity	Solved (LP/P in OMIM gene)	AR homozygous	CANT1	p.Glu215Lys	Desbuquois dysplasia 1 (MIM:251450)	all overlap			Full	Published as novel phenotype association	PMID:31988067
PED043	Female	Trio	Neonatal death	No	0.04572	38	1	Multiple congenital anomalies, genetic cause suspected	Recurrent for couple	1	Urogenital	Horseshoe kidney, Asplenia, Bicornuate uterus, Diaphragmatic eventration, Pulmonary hypoplasia, Abnormal lung lobation, Overlapping toe, Overlapping fingers	Solved (LP/P in OMIM gene)	AD paternal mosaic 10-20%	PBX1	p.Arg107Trp	Congenital anomalies of kidney and urinary tract syndrome with or without hearing loss, abnormal ears, or developmental delay (MIM:617641)	Most overlap	Apslenia, severity of diaphragmatic involvement		Full, phenotype expansion	Published as case report	PMID:32141698
PED044	Female	Trio	Termination	No	-0.007585	20		Multiple congenital anomalies, genetic cause suspected	Isolated case for couple		Cardiovascular	Subvalvular aortic stenosis, Transposition of the great arteries, Double outlet right ventricle, Left superior vena cava draining to coronary sinus, Hypoplastic left heart, Hypoplastic aortic arch, Abnormal tricuspid valve morphology, Ventricular septal defect, Renal agenesis, Abnormality of the uterus	Solved (LP/P in novel gene)	AD de novo	GNB2	p.Lys89Glu	No OMIM disease gene				Novel - full	Published as novel disease gene association	PMID:34183358
PED045	Male	Trio	Stillbirth	No	-0.04146	26		Multiple congenital anomalies, genetic cause suspected	Isolated case for couple		Respiratory	Tracheoesophageal fistula, Laryngeal atresia, Esophageal atresia	Candidate (GUS)	AR compound heterozygous	ZFHX3	p.Gln3204del/p.Ser3625Leu	No OMIM disease gene
PED046	Female	Trio	Termination	No	-0.03734	21		Multiple congenital anomalies, genetic cause suspected	Isolated case for couple		Cardiovascular	Hypoplastic left atrium, Hypoplastic aortic arch, Single ventricle, Pulmonary artery dilatation, Persistent left superior vena cava, Renal hypoplasia, Bilateral renal dysplasia, Abnormal lung lobation	Solved (LP/P in OMIM gene)	AD de novo (dual diagnosis) AD de novo (dual diagnosis)	KMT2D SOS2	p.Leu2331* p.Thr295Ala	Kabuki Syndrome (MIM:147920); Noonan Syndrome 9 (MIM:616559)	Combination of Kabuki, and Noonan overlap			Full, Dual diagnosis		PMID: 23320472
PED047	Female	Quad	Stillbirth	No	-0.01048	33		Unexplained fetal death	Recurrent for couple	1	No abnormality detected		Unresolved (NAD)
PED049	Male	Trio	Stillbirth	No	-0.05602	34		Unexplained fetal death	Isolated case for couple		Haematopoietic and immune	Abnormal thrombosis	Candidate (VUS in OMIM gene)	AD inherited	KCNJ2	p.Leu382Arg	Short QT syndrome 3 (MIM:609622)	Overlap
PED051	Male	Quad	Termination	No	0.002756	22+5		Multiple congenital anomalies, genetic cause suspected	Recurrent for couple	3	Muscular (incl. neuromuscular)	Congenital diaphragmatic hernia, Pulmonary hypoplasia	Candidate (VUS in OMIM gene)	AD inherited	ZFPM2	22kb duplication incl ZFPM2	Diaphragmatic hernia 3 (MIM:610187)	Most overlap			Partial	some family members unaffected
PED052	Male	Trio	Termination	No	0.02297	22+3		Multiple congenital anomalies, genetic cause suspected	Isolated case for couple		Neurological	Semilobar holoprosencephaly, Abnormality of neuronal migration, Cleft palate, Abnormality of the external nose, Cortical dysplasia	Unresolved (NAD)
PED053	Female	Trio	Termination	No	0.01147	22		Multiple congenital anomalies, genetic cause suspected	Isolated case for couple		Urogenital	Multicystic kidney dysplasia, Abnormality of pancreas morphology	Solved (LP/P in OMIM gene)	AD de novo	HNF1B	c.344+2_344+5delTAGG (p.?)	Renal cysts and diabetes syndrome (MIM:137920)	All overlap			Full
PED054	Female	Trio	Termination	No	-0.004025	20+1		Multiple congenital anomalies, genetic cause suspected	Isolated case for couple		Global	Abnormal ascending aorta morphology, Persistent left superior vena cava, Agenesis of corpus callosum, Congenital diaphragmatic hernia, Abnormal facial shape, Cleft palate, Aplasia/Hypoplasia of the nails	Solved (LP/P in OMIM gene)	AD de novo	ARID1A	p.Ala1136Ser	Coffin-Siris syndrome 2 (MIM:614607)	All overlap			Full
PED055	Male	Trio	Termination	No	0.004075	17+5		Single congenital anomaly, genetic cause suspected	Recurrent for mother	3	Neurological	Arnold-Chiari malformation, Myelomeningocele, Hydrocephalus	Unresolved (NAD)
PED056	Male	Quad	Miscarriage	No	0.02244	17		Unexplained fetal death	Recurrent for couple	1	No abnormality detected		Solved (LP/P in novel phenotype)	XLR	ARSL	p.Arg403*	Chondrodysplasia punctata, X-linked recessive (MIM:302950)	death in utero described in 2 other cases			Full, phenotype expansion
PED057	Female	Trio	Termination	No	-0.003039	27+2		Multiple congenital anomalies, genetic cause suspected	Isolated case for couple		Skeletal	Abnormal facial shape, Micrognathia, Single transverse palmar crease, Supernumerary ribs, Slender long bone, Limb undergrowth, Aplasia of the nasal bone, Small for gestational age, Long eyelashes, Brachycephaly	Solved (LP/P in OMIM gene)	AD de novo	NIPBL	p.Tyr2430Cys	Cornelia de Lange syndrome 1 (MIM:122470)	all overlap			Full		PMID: 15318302, PMID: 22740382, PMID: 22991273
PED058	Male	Trio	Termination	No	-0.01145	22		Multiple congenital anomalies, genetic cause suspected	Isolated case for couple		Global	Goiter, Cleft upper lip, Cleft palate, 4-5 toe syndactyly, 2-3 toe syndactyly	Unresolved (NAD)
PED060	Female	Trio	Termination	No	0.008106	27		Multiple congenital anomalies, genetic cause suspected	Recurrent for couple	1	Lymphatic (incl. non-immune hydrops)	Fetal cystic hygroma, Increased nuchal translucency	Candidate (GUS)	AR homozygous	FLII	p.Phe1143Tyr	No OMIM disease gene				Uncertain
PED061	Male	Trio	Termination	No	0.00351	18		Single congenital anomaly, genetic cause suspected	Isolated case for couple		Urogenital	Bilateral renal agenesis, Aplasia/Hypoplasia of the bladder	Unresolved (NAD)
PED063	Female	Trio	Termination	No	-0.007061	25		Multiple congenital anomalies, genetic cause suspected	Isolated case for couple		Metabolic and Endocrine	Adrenal hypoplasia, Abnormal heart morphology, Intrauterine growth retardation	Solved (LP/P in OMIM gene)	AD de novo	SAMD9	p.Arg824Gln	MIRAGE syndrome (MIM:617053)	All overlap			Full
PED065	Male	Quad	Termination	No	0.02228	21		Multiple congenital anomalies, genetic cause suspected	Recurrent for couple	1	Cardiovascular	Hypoplastic right heart, Dysplastic tricuspid valve, Duplicated collecting system	Unresolved (NAD)
PED066	Female	Trio	Stillbirth	No	0.002543	34		Single congenital anomaly, genetic cause suspected	Isolated case for couple		Respiratory	Congenital diaphragmatic hernia, Pulmonary hypoplasia, Abnormal facial shape, Hypertelorism, Depressed nasal bridge, Macroglossia	Candidate (VUS in novel phenotype)	AD de novo	TBX5 & TBX3	2MB duplication incl TBX3 and TBX5	Ulnar-mammary syndrome (MIM:181450); Holt-Oram syndrome (MIM:142900)	Most overlap	diaphragmatic hernia not well described, macroglossia		Uncertain
PED068	Female	Trio	Stillbirth	No	-0.006639	38+5		Multiple congenital anomalies, genetic cause suspected	Isolated case for couple		Global	Double outlet right ventricle, Atrioventricular canal defect, Duodenal atresia, Severe intrauterine growth retardation, Cleft palate, Partial agenesis of the corpus callosum, Horseshoe kidney, Abnormal pulmonary valve morphology, Perisylvian polymicrogyria,	Unresolved (NAD)
PED069	Male	Trio	Termination	No	-0.0266	21+6		Multiple congenital anomalies, genetic cause suspected	Isolated case for couple		Skeletal	Intrauterine growth retardation, Talipes equinovarus, Hypertelorism, Short palpebral fissure, Anteverted nares, Smooth philtrum, Abnormality of the pinna	Solved (LP/P in OMIM gene)	XLR de novo	HUWE1	p.Leu2176Arg	Mental retardation, X-linked syndromic, Turner type (MIM:309590)	All overlap		usually hypotelorism but not an expansion	Full		PMID:29180823
PED070	Male	Trio	Neonatal death	No	0.03933	33	12	Multiple congenital anomalies, genetic cause suspected	Isolated case for couple		Neurological	Median cleft palate, Cerebellar hypoplasia, Hypoplasia of the pons, Ventriculomegaly, Abnormality of the anterior fontanelle, Ulnar deviation of the hand, Muscular ventricular septal defect, Telecanthus, Narrow mouth, Sparse eyelashes	Unresolved (NAD)
PED071	Male	Trio	Termination	No	-0.001868	22		Multiple congenital anomalies, genetic cause suspected	Isolated case for couple		Neurological	Agenesis of corpus callosum, Retrognathia, Low-set ears, Abnormality of the ureter, Periventricular gray matter heterotopia	Candidate (VUS in OMIM gene)	XLR	AIFM1	p.Arg3Gln	Spondyloepimetaphyseal dysplasia, X-linked, with hypomyelinating leukodystrophy (MIM:300232); Cowchock syndrome (MIM:310490); Combined oxidative phosphorylation deficiency 6 (MIM:300816)	Usually normal at birth			Full, phenotype expansion
PED072	Male	Trio	Neonatal death	No	-0.01438	38	1	Single congenital anomaly, genetic cause suspected	Isolated case for couple		Cardiovascular	Abnormal mitral valve morphology, Cardiomegaly, Left ventricular hypertrophy, Large for gestational age, Macrocephaly at birth	Unresolved (NAD)
PED073	Female	Trio	Termination	Yes	0.08562	17		Multiple congenital anomalies, genetic cause suspected	Isolated case for couple		Neurological	Alobar holoprosencephaly, Ventricular septal defect, Hypotelorism, Anal atresia, Camptodactyly of finger, Talipes equinovarus, Hand clenching, Single umbilical artery	Candidate (VUS in OMIM gene)	AR compound heterozygous	KIAA0586	p.Asn388Ser/p.Ala523Val	Joubert syndrome 23 (MIM:616490); Short-rib thoracic dysplasia 14 with polydactyly (MIM:616546)	Some overlap	holoprosencephaly		Full, phenotype expansion
PED074	Female	Trio	Termination	No	-0.02017	22+5		Multiple congenital anomalies, genetic cause suspected	Isolated case for couple		Global	Mesocardia, Aplasia/Hypoplasia of the cerebellar vermis, Cleft soft palate, Accessory spleen, Talipes cavus equinovarus, Cerebellar vermis hypoplasia, Short corpus callosum, Renal cyst	Solved (LP/P in OMIM gene)	AD de novo	SMARCB1	p.Arg377His	Coffin-Siris syndrome 3 (MIM:614608)	All overlap			Full
PED075	Male	Trio	Termination	No	0.009336	16		Single congenital anomaly, genetic cause suspected	Isolated case for couple		Neurological	Hydrocephalus, Polymicrogyria, Agenesis of corpus callosum	Candidate (GUS)	AR compound heterozygous	HELZ2	p.Leu720Val/p.Ala915Thr	No OMIM disease gene				Uncertain
PED076	Male	Trio	Termination	No	-0.02882	24		Multiple congenital anomalies, genetic cause suspected	Isolated case for couple		Urogenital	Ambiguous genitalia, male	Unresolved (NAD)
PED077	Female	Trio	Termination	No	-0.06015	22+4		Multiple congenital anomalies, genetic cause suspected	Isolated case for couple		Cardiovascular, Skeletal	Intrauterine growth retardation, Scoliosis, Perimembranous ventricular septal defect, Edema, Prominent calcaneus, Rocker bottom foot, Abnormality of the umbilical cord	Candidate (VUS in OMIM gene)	AR compound heterozygous	TAF2	p.Cys192Phe/p.Pro844Leu	Mental retardation, autosomal recessive 40 (MIM:615599)		many features not reported before		Partial
PED078	Male	Quad	Termination	No	0.003886	22+5		Multiple congenital anomalies, genetic cause suspected	Recurrent for couple	1	Urogenital	Abnormal renal morphology, Cleft upper lip, Median cleft palate, Ovotestis, enlarged thyroid, oral frenulae	Candidate (VUS in novel phenotype)	XLR	BCORL1	p.Tyr1692*	Shukla-Vernon syndrome (MIM:301029)	Limited overlap			Uncertain
PED081	Male	Trio	Stillbirth	No	0.01582	33		Unexplained fetal death	Isolated case for couple		No abnormality detected		Unresolved (NAD)
PED082	Female	Trio	Termination	No	-0.1092	22+6		Single congenital anomaly, genetic cause suspected	Isolated case for couple		Neurological	Agenesis of corpus callosum, Polymicrogyria, Single transverse palmar crease	Unresolved (NAD)
PED083	Female	Trio	Stillbirth	No	-0.01075	21+2		Multiple congenital anomalies, genetic cause suspected	Isolated case for couple		Neurological, Urogenital	Absent septum pellucidum, Unilateral renal hypoplasia, Periventricular gray matter heterotopia, Downturned corners of mouth, Abnormality of the nares, Wide nose, Placental infarction, Long umbilical cord, Abnormality of the amniotic fluid,	Unresolved (NAD)
PED084	Female	Trio	Termination	No	-0.008434	22		Multiple congenital anomalies, genetic cause suspected	Isolated case for couple		Neurological	Lissencephaly, Ventriculomegaly, Agenesis of corpus callosum, Posterior fossa cyst, Abnormality of neuronal migration, Cerebellar hypoplasia, Microcephaly, Abnormally large globe, Abnormal lung lobation, Hypotelorism	Solved (LP/P in OMIM gene)	AD paternal mosaic 2-3%	TUBA1A	p.Arg64Trp	Lissencephaly 3 (MIM:602529)	All overlap			Full
PED085	Female	Trio	Termination	No	-0.2842	18+4		Multiple congenital anomalies, genetic cause suspected	Isolated case for couple		Global	Fetal cystic hygroma, Edema, Abnormal heart morphology, Pleural effusion, Abnormal facial shape, Morphological abnormality of the gastrointestinal tract, Abnormal bone structure, Single umbilical artery, Abnormal insertion of umbilical cord,	Solved (LP/P in OMIM gene)	AD de novo	RAF1	p.Leu613Val	Noonan syndrome 5 (MIM:611553); Leopard syndrome 2 (MIM:611554)	All overlap			Full
PED086	Female	Trio	Termination	No	0.0141	20+1		Single congenital anomaly, genetic cause suspected	Isolated case for couple		Urogenital	Bilateral renal agenesis, Epicanthus	Solved (LP/P in OMIM gene)	AD de novo	GREB1L	p.Thr1872Asnfs*24	Renal hypodysplasia/aplasia 3 (MIM:617805)	All overlap			Full
PED087	Male	Trio	Stillbirth	No	-0.2522	27		Multiple congenital anomalies, genetic cause suspected	Isolated case for couple		Gastrointestinal	Hepatomegaly, Intestinal malrotation, Large placenta, Splenomegaly, Enlarged kidney, Morphological abnormality of the gastrointestinal tract	Unresolved (NAD)
PED088	Male	Trio	Termination	No	-0.0245	21+1		Multiple congenital anomalies, genetic cause suspected	Isolated case for couple		Cardiovascular	Heterotaxy, Right atrial isomerism, Atrial septal defect, Mitral atresia, Hypoplastic left heart, Truncus arteriosus, Bronchial isomerism, Asplenia, Intestinal malrotation, Anomalous pulmonary venous return	Candidate (GUS)	AR compound heterozygous	KDM2B	p.Arg888Pro/p.Glu928Val	No OMIM disease gene				Uncertain
PED089	Female	Trio	Stillbirth	No	-0.0006006	23		Unexplained fetal death	Recurrent for couple	1	No abnormality detected		Unresolved (NAD)
PED091	Male	Trio	Neonatal death	No	0.01523	30+0	1	Multiple congenital anomalies, genetic cause suspected	Isolated case for couple		Respiratory	Nonimmune hydrops fetalis, Diffuse alveolar hemorrhage, Edema	Solved (LP/P in OMIM gene)	AD de novo	MAP2K2	p.Glu207Ala	Cardiofaciocutaneous syndrome 4 (MIM:615280)	All overlap			Full
PED093	Female	Trio	Neonatal death	No	0.004759	32+5	1	Multiple congenital anomalies, genetic cause suspected	Isolated case for couple		Haematopoietic and immune	Hydrops fetalis, Pleural effusion, Hepatosplenomegaly, Abnormality of blood and blood-forming tissues, Reticulocytosis, Amegakaryocytic thrombocytopenia	Solved (LP/P in OMIM gene)	AD de novo	PTPN11	p.Thr73Ile	Noonan syndrome 1 (MIM:163950); LEOPARD syndrome 1 (MIM151100); Metachondromatosis (MIM:156250)	All overlap			Full
PED095	Male	Trio	Termination	No	-0.04854	13		Multiple congenital anomalies, genetic cause suspected	Isolated case for couple		Urogenital	Unilateral renal agenesis, Anorectal anomaly, Cloacal abnormality, Fetal megacystis, Renal dysplasia, Oligohydramnios, Lower limb undergrowth	Unresolved (NAD)
PED096	Female	Trio	Termination	No	-0.009036	20+5		Multiple congenital anomalies, genetic cause suspected	Isolated case for couple		Global	Tetralogy of Fallot, Ambiguous genitalia, female, Meckel diverticulum, Multiple renal cysts, Abnormal localization of kidney, Renal hypoplasia, Single umbilical artery, Sandal gap	Candidate (GUS)	AR homozygous	EMR3	c.355+2T>G (p.?)	No OMIM disease gene
PED097	Female	Trio	Termination	No	-0.01635	16		Single congenital anomaly, genetic cause suspected	Isolated case for couple		Urogenital	Cloacal abnormality, Abnormal renal morphology	Unresolved (NAD)
PED098	Male	Trio	Termination	No	-0.002267	20+5		Multiple congenital anomalies, genetic cause suspected	Recurrent for couple	1	Global	Intrauterine growth retardation, Atrial septal defect, Hepatic calcification, Abnormal facial shape	Solved (LP/P in OMIM gene)	AR compound heterozygous	POLG	p.Arg309His /p.Ala467Thr	Mitochondrial DNA depletion syndrome 4A (Alpers type) (MIM:203700); Mitochondrial DNA depletion syndrome 4B (MNGIE type) (MIM:613662); Mitochondrial recessive ataxia syndrome (includes SANDO and SCAE) (MIM:607459); Progressive external ophthalmoplegia, autosomal recessive 1 (MIM:258450)	All overlap			Full, phenotype expansion	early presentation and hepatic calcification represent expansion
PED100	Male	Quad	Termination	No	N/A	19+5		Multiple congenital anomalies, genetic cause suspected	Recurrent for couple	3	Neurological	Occipital encephalocele, Malformation of the hepatic ductal plate, Cleft palate	Unresolved (NAD)
PED102	Female	Trio	Neonatal death	No	0.006612	36	1	Unexplained neonatal death	Isolated case for couple		Respiratory	Pulmonary hemorrhage	Candidate (VUS in OMIM gene)	AD de novo AD de novo	SIN3A ALAS2	p.Gln361ArgfsTer29 p.Cys11Gly	Witteveen-Kolk syndrome (MIM:613406)				Uncertain
PED103	Female	Trio	Termination	No	0.006503	21		Multiple congenital anomalies, genetic cause suspected	Isolated case for couple		Neurological	Congenital diaphragmatic hernia, Agenesis of corpus callosum, Cerebellar hemisphere hypoplasia, Ventricular septal defect	Solved (LP/P in OMIM gene)	AD de novo	DDX3X	p.Pro568Leu	Intellectual developmental disorder, X-linked, syndrome, Snijders Blok type (MIM:300958)	Most overlap	Diaphragmatic hernia		Full, phenotype expansion	diaphragmatic hernia represents expansion
PED104	Female	Trio	Stillbirth	No	0.03664	20+2		Multiple congenital anomalies, genetic cause suspected	Other	1	Haematopoietic and immune	Nonimmune hydrops fetalis, Preaxial polydactyly, Supernumerary ribs, Coronal cleft vertebrae	Solved (LP/P in OMIM gene)	AD inherited (M) AD inherited (M)	MECOM RYR2	c.2577+4A>T (p.?) p.Val4176Met	Radioulnar synostosis with amegakaryocytic thrombocytopenia 2 (MIM:616738)	Most overlap	polydactyly (?mice only)		Full
PED107	Male	Quad	Neonatal death	No	0.005419	36+1	5	Multiple congenital anomalies, genetic cause suspected	Recurrent for couple	1	Neurological	Pachygyria, Congenital microcephaly, Arthrogryposis multiplex congenita, Micropenis, Seizures	Candidate (VUS in OMIM gene)	AR compound heterozygous	VARS	p.Pro344His/p.Thr1068Met	Neurodevelopmental disorder with microcephaly, seizures, and cortical atrophy (MIM:617802)	Most overlap	micropenis		Full, phenotype expansion
PED108	Male	Trio	Termination	No	0.01743	22+1		Single congenital anomaly, genetic cause suspected	Isolated case for couple		Muscular (incl. neuromuscular)	Arthrogryposis multiplex congenita, Abnormal facial shape, Talipes equinovarus, Talipes calcaneovalgus	Unresolved (NAD)
PED109	Male	Trio	Termination	No	-0.03255	20+6		Multiple congenital anomalies, genetic cause suspected	Isolated case for couple		Cardiovascular	Abnormal heart morphology, Ambiguous genitalia	Candidate (VUS in OMIM gene)	AR compound heterozygous	TOE1	p.Ala54Val/p.His319Tyr	Pontocerebellar hypoplasia, type 7 (MIM:614969)		Heart abnormality missing		Partial
PED110	Male	Trio	Stillbirth	Yes	-0.1468	23+4		Multiple congenital anomalies, genetic cause suspected	Isolated case for couple		Cardiovascular	Abnormal heart morphology, Hypoplasia of the brainstem	Candidate (VUS in novel gene)	AR homozygous	HEATR5B	p.Ala1344Glyfs*2	No OMIM disease gene; disease association in PMID: 33824466
PED111	Female	Trio	Termination	No	-0.001682	25+5		Single congenital anomaly, genetic cause suspected	Isolated case for couple		Neurological	Progressive microcephaly	Unresolved (NAD)
PED112	Male	Trio	Termination	No	-0.2018	20+2		Multiple congenital anomalies, genetic cause suspected	Isolated case for couple		Muscular (incl. neuromuscular)	Arthrogryposis multiplex congenita, Pterygium	Unresolved (NAD)
PED113	Female	Trio	Termination	No	-0.003608	27+0		Single congenital anomaly, genetic cause suspected	Isolated case for couple		Neurological	Agenesis of corpus callosum, Heterotopia, Cortical irregularity	Candidate (VUS in novel phenotype)	AR compound heterozygous	NUP85	p.Asn370Ser/p.Met530Thr	Nephrotic syndrome, type 17	Little overlap			Uncertain	Published as novel phenotype association	PMID:34170319
PED114	Female	Trio	Termination	No	0.02056	17		Multiple congenital anomalies, genetic cause suspected	Isolated case for couple		Connective tissue and skin	Cystic hygroma, Arthrogryposis multiplex congenita, Multiple pterygia, Hydrops fetalis	Candidate (VUS in novel phenotype)	AR compound heterozygous	UNC13D	p.Val300Met/p.Met795Thr	Hemophagocytic lymphohistiocytosis, familial, 3 (MIM:608898)	Little overlap			Uncertain
PED115	Male	Trio	Stillbirth	No	0.009745	22		Multiple congenital anomalies, genetic cause suspected	Isolated case for couple		Haematopoietic and immune	Severe hydrops fetalis, Anemia	Candidate (VUS in novel phenotype)	XLR	SLC9A7	c.1030-1G>C (p.?)	Intellectual developmental disorder, X-linked 108 (MIM:301024)	Little overlap			Uncertain
PED116	Female	Trio	Neonatal death	No	0.01276	30+2	1	Multiple congenital anomalies, genetic cause suspected	Recurrent for couple	1	Skeletal, Cardiovascular	Pulmonary artery stenosis, Intrauterine growth retardation, Abnormal skull morphology, Polyhydramnios, Abnormal thumb morphology	Solved (LP/P in OMIM gene)	AR compound heterozygous	ADAMTSL2	p.Arg113His /p.Gly354Alafs*7	Geleophysic dysplasia 1 (MIM:231050)	All overlap			Full		PMID:21415077
PED117	Male	Trio	Termination	No	-0.006462	22		Single congenital anomaly, genetic cause suspected	Isolated case for couple		Neurological	Hydrocephalus, cerebral hemorrhage	Candidate (VUS in novel phenotype)	XLR	TRPC5	p.Pro398Thr	No OMIM disease gene				Uncertain
PED118	Male	Trio	Miscarriage	No	0.02687	15		Unexplained fetal death	Recurrent for couple	2	No abnormality detected		Candidate (VUS in OMIM gene)	AR compound heterozygous	TOR1AIP1	p.Asp160His/p.Gln226*	Muscular dystrophy, autosomal recessive, with rigid spine and distal joint contractures (MIM:617072)	May be normal at birth			Full
PED119	Male	Trio	Termination	No	0.003376	24+5		Multiple congenital anomalies, genetic cause suspected	Isolated case for couple		Skeletal, Lymphatic	Short femur, Short humerus, Increased nuchal translucency, Pleural effusion	Solved (LP/P in OMIM gene)	AD de novo	LZTR1	p.Gly301Val	Noonan syndrome 10 (MIM:616564)	All overlap			Full
PED120	Female	Trio	Termination	No	N/A	22		Multiple congenital anomalies, genetic cause suspected	Isolated case for couple		Neurological	Abnormal lung lobation, Ventriculomegaly, Atrial septal defect, Scoliosis, Esophageal atresia, Multicystic kidney dysplasia, Aplasia of the bladder, Aplasia of the uterus, Splenopancreatic fusion, Anal atresia	Unresolved (NAD)
PED121	Female	Trio	Neonatal death	No	0.07614	28+6	4	Other	Other	2	Pulmonary, Cardiovascular	Pulmonary arterial hypertension, Emphysema	Solved (LP/P in OMIM gene)	AD inherited (M)	FOXF1	p.Gly302Profs*46	Alveolar capillary dysplasia with misalignment of pulmonary veins (MIM:265380)	All overlap			Full
PED122	Male	Trio	Termination	No	-0.03405	18+2		Multiple congenital anomalies, genetic cause suspected	Isolated case for couple		Global	Ventriculomegaly, Congenital diaphragmatic hernia, Ventricular septal defect, Thoracic scoliosis, Tracheoesophageal fistula, Abnormal heart morphology, Single umbilical artery	Candidate (VUS in OMIM gene)	AD de novo	TTN	p.Arg20245*	Congenital titanopathy; e.g. Myopathy, myofibrillar, 9, with early respiratory failure (MIM:603689)		diaphragmatic hernia		Uncertain
PED123	Female	Trio	Stillbirth	No	0.01272	22		Unexplained fetal death	Isolated case for couple		Skeletal	Pulmonary hypoplasia, Micrognathia, Microcephaly	Unresolved (NAD)
PED124	Male	Trio	Termination	No	0.01708	23		Multiple congenital anomalies, genetic cause suspected	Isolated case for couple		Skeletal	Coronal craniosynostosis, Cleft palate, Abnormal lung lobation, Proptosis, Hypertelorism	Unresolved (NAD)
PED127	Male	Trio	Stillbirth	No	-0.0216	26		Unexplained fetal death	Isolated case for couple		No abnormality detected		Unresolved (NAD)
PED128	Female	Trio	Termination	No	0.03029	22		Single congenital anomaly, genetic cause suspected	Isolated case for couple		Neurological	Ventriculomegaly, Intraventricular hemorrhage	Candidate (GUS)	AD de novo	PROX1	p.Asn131Ser	No OMIM disease gene				Uncertain
PED129	Female	Trio	Termination	No	0.03346	22		Multiple congenital anomalies, genetic cause suspected	Isolated case for couple		Neurological	Neural tube defect, Talipes equinovarus, Arnold-Chiari malformation, Absent nasal septal cartilage, Microretrognathia, Pulmonary artery dilatation, Ventriculomegaly, Cleft soft palate	Candidate (GUS)	AR compound heterozygous	DNAH14	p.Lys2765Glu/p.Arg4313Gln	No OMIM disease gene				Uncertain
PED131	Male	Quad	Termination	No	0.02361	15		Multiple congenital anomalies, genetic cause suspected	Recurrent for couple	2	Skeletal	Lethal skeletal dysplasia, Nonimmune hydrops fetalis, Conotruncal defect	Candidate (VUS in novel inheritance)	AR homozygous	COG4	p.Arg468Gln	Saul-Wilson syndrome (AD) (MIM:618150)	Severe compared to others in literature			Uncertain
PED132	Female	Trio	Termination	No	0.01835	13 +2		Multiple congenital anomalies, genetic cause suspected	Isolated case for couple		Neurological	Holoprosencephaly, Hypertelorism, Cleft lip, Cleft palate, Abnormal lung morphology	Candidate (GUS)	AR compound heterozygous	RAPH1	c.1512+2C>T (p.?)/p.Pro611Leu	No OMIM disease gene				Uncertain
PED133	Male	Trio	Termination	No	-0.07911	19+5		Multiple congenital anomalies, genetic cause suspected	Recurrent for couple	1	Urogenital	Intrauterine growth retardation, Hydronephrosis, Hypospadias, Osteopenia, Abnormal placenta morphology	Unresolved (NAD)
PED134	Female	Trio	Termination	No	0.01782	30+5		Multiple congenital anomalies, genetic cause suspected	Isolated case for couple		Neurological	Septo-optic dysplasia, Polymicrogyria	Unresolved (NAD)
PED135	Male	Trio	Stillbirth	No	0.03275	26		Unexplained fetal death	Isolated case for couple		No abnormality detected		Candidate (GUS)	AD de novo	SIN3B	p.Arg887Trp	No OMIM disease gene				Uncertain
PED136	Female	Quad	Termination	No	-0.001955	22+3		Single congenital anomaly, genetic cause suspected	Recurrent for couple	1	Neurological	Microcephaly, Lissencephaly, Hypoplasia of the corpus callosum	Unresolved (NAD)
PED138	Male	Trio	Termination	Yes	0.01209	24+5		Single congenital anomaly, genetic cause suspected	Isolated case for couple		Urogenital	Renal dysplasia, Potter facies	Solved (LP/P in OMIM gene)	AR homozygous	PKHD1	p.Arg564*	Polycystic kidney disease 4, with or without hepatic disease (MIM:263200)	All overlap			Full
PED139	Male	Quad	Stillbirth	No	0.001689	25		Multiple congenital anomalies, genetic cause suspected	Recurrent for couple	1	Neurological	Intraventricular hemorrhage, Hydrocephalus, Intrauterine growth retardation	Unresolved (NAD)
PED140	Male	Trio	Termination	No	-0.003168	20+3		Multiple congenital anomalies, genetic cause suspected	Isolated case for couple		Skeletal	2-4 finger syndactyly, Single transverse palmar crease, Short femur, Aplasia/Hypoplasia of the tibia, 2-4 toe syndactyly, Aplasia/Hypoplasia of metatarsal bones, Aplasia/Hypoplasia involving the metacarpal bones, Thin vermilion border, Skeletal dysplasia,	Unresolved (NAD)
PED141	Female	Trio	Stillbirth	No	0.008008	39		Multiple congenital anomalies, genetic cause suspected	Isolated case for couple		Other	Meckel diverticulum, Abnormality of the ribs, Cervical ribs	Unresolved (NAD)
PED143	Female	Trio	Termination	No	0.002575	16+2		Multiple congenital anomalies, genetic cause suspected	Isolated case for couple		Other	Bilateral radial aplasia, Anal atresia, Abnormal heart valve morphology, Abnormal lung lobation, Unilateral renal agenesis, Ambiguous genitalia, Esophageal atresia, Abnormality of the ribs, Single umbilical artery, Mild fetal ventriculomegaly	Unresolved (NAD)
PED144	Male	Trio	Stillbirth	No	0.004272	20+4		Multiple congenital anomalies, genetic cause suspected	Isolated case for couple		Neurological	Spina bifida, Pericardial effusion, Cerebellar vermis hypoplasia, Mesomelic/rhizomelic limb shortening, Ambiguous genitalia, Hypospadias, Bifid scrotum, Midface retrusion	Candidate (VUS in novel phenotype)	AD de novo	CACNA1E	p.Asp293His	Developmental and epileptic encephalopathy 69 (MIM:618285)		Neural tube defect/spina bifida, limb shortening		Uncertain
PED145	Male	Trio	Stillbirth	Yes	0.04216	28		Multiple congenital anomalies, genetic cause suspected	Isolated case for couple		Skeletal	Skeletal dysplasia, Anal atresia	Candidate (VUS in OMIM gene)	AR homozygous	MMP9	p.Val610Met	Metaphyseal anadysplasia 2 (MIM:613073)		Anal atresia		Partial		PMID:31337883
PED146	Male	Trio	Termination	No	-0.04147	18+3		Single congenital anomaly, genetic cause suspected	Recurrent for couple	1	Urogenital	Bilateral renal agenesis	Unresolved (NAD)
PED148	Male	Quad	Termination	Yes	0.1113	17+3		Multiple congenital anomalies, genetic cause suspected	Recurrent for couple	1	Global	Intrauterine growth retardation, Abnormality of the lower limb, Hypospadias, Ventriculomegaly, Forearm reduction defects, Hydronephrosis, Midgut malrotation, Absent gallbladder, Small placenta	Unresolved (NAD)
PED150	Male	Trio	Stillbirth	No	-0.374	29		Single congenital anomaly, genetic cause suspected	Isolated case for couple		Global	Severe hydrops fetalis, Nonimmune hydrops fetalis	Unresolved (NAD)
PED151	Male	Trio	Termination	No	-0.02117	15		Multiple congenital anomalies, genetic cause suspected	Isolated case for couple		Urogenital	Bladder outlet obstruction, Anorectal anomaly, Rectovaginal fistula, Renal agenesis, Abnormal renal morphology	Unresolved (NAD)
PED152	Female	Trio	Neonatal death	No	-0.01791	38+1	11	Multiple congenital anomalies, genetic cause suspected	Isolated case for couple		Respiratory	Tracheoesophageal fistula, Aplasia/Hypoplasia of the lungs, Vertebral segmentation defect, Aplasia/Hypoplasia of the thumb, Anteriorly placed anus	Unresolved (NAD)
PED153	Male	Trio	Termination	No	0.005161	23		Multiple congenital anomalies, genetic cause suspected	Isolated case for couple		Urogenital	Unilateral renal agenesis, Cystic renal dysplasia, Abnormal lung lobation, Ventricular septal defect	Unresolved (NAD)
PED154	Male	Trio	Termination	No	-0.03636	24		Multiple congenital anomalies, genetic cause suspected	Isolated case for couple		Global	Hypertelorism, Short long bone, Dextrocardia, Hypospadias, Abnormal lung lobation	Candidate (VUS in OMIM gene)	AR compound heterozygous	DHX37	p.Glu172_L173_insSerGlu p.Arg889Gln	Neurodevelopmental disorder with brain anomalies and with or without vertebral or cardiac anomalies (MIM:618731)	All overlap			Full
PED156	Female	Trio	Termination	No	0.01345	20+2		Single congenital anomaly, genetic cause suspected	Isolated case for couple		Muscular (incl. neuromuscular)	Arthrogryposis multiplex congenita	Solved (LP/P in OMIM gene)	AD de novo	ACTA1	p.Glu272Lys	Congenital myopathy, autosomal dominant or recessive (MIM:161800)	All overlap			Full
PED157	Female	Trio	Termination	No	-0.2796	24+6		Multiple congenital anomalies, genetic cause suspected	Isolated case for couple		Neurological	Dandy-Walker malformation, Postaxial polydactyly, Vascular ring, Agenesis of corpus callosum	Solved (LP/P in OMIM gene)	AD de novo	USP9X	p.Phe208Cysfs*?	Mental retardation, X-linked 99, syndromic, female-restricted (MIM:300919)	All overlap			Full		PMID: 26833328
PED158	Female	Trio	Stillbirth	No	0.007	34		Multiple congenital anomalies, genetic cause suspected	Isolated case for couple		Neurological	Arthrogryposis multiplex congenita, Macrocephaly	Solved (LP/P in OMIM gene)	AD de novo	ACTA1	p.Gly199Asp	Congenital myopathy, autosomal dominant or recessive (MIM:161800)	Most overlap	Macrocephaly, but non-specific		Full
PED159	Female	Trio	Termination	No	0.01144	27		Multiple congenital anomalies, genetic cause suspected	Isolated case for couple		Lymphatic (incl. non-immune hydrops)	Synophrys, Hirsutism, Abnormality of the face, Low-set ears, Epicanthus, Short nose, Thin upper lip vermilion, Broad neck	Unresolved (NAD)
PED160	Male	Trio	Stillbirth	No	-0.03096	34		Unexplained fetal death	Isolated case for couple		Urogenital	Venous thrombosis	Unresolved (NAD)
PED161	Female	Quad	Termination	No	-0.04331	18+6		Other	Recurrent for couple	1	Haematopoietic and immune	Small placenta, Anemia, Intrauterine growth retardation	Unresolved (NAD)
PED162	Female	Trio	Termination	No	-0.01843	33		Single congenital anomaly, genetic cause suspected	Isolated case for couple		Neurological	Agenesis of corpus callosum, Colpocephaly	Candidate (GUS)	AD de novo	EWSR1	p.Leu169Gln	No OMIM disease gene				Uncertain
PED164	Male	Trio	Termination	No	-0.007082	22		Single congenital anomaly, genetic cause suspected	Isolated case for couple		Neurological	Partial agenesis of the corpus callosum, Blake's pouch cyst, Ventriculomegaly	Unresolved (NAD)
PED165	Female	Trio	Stillbirth	No	-0.04056	27		Multiple congenital anomalies, genetic cause suspected	Isolated case for couple		Urogenital	Low-set ears, Cleft palate, Abnormal cardiac septum morphology, Single umbilical artery, Abnormal vertebral morphology, Intrauterine growth retardation, Protuberant abdomen, Talipes equinovarus, Subchorionic thrombohematoma	Solved (LP/P in OMIM gene)	AD de novo	USP9X	p.Gln2246*	Mental retardation, X-linked 99, syndromic, female-restricted (MIM:300919)	All overlap			Full		PMID: 26833328,
PED167	Female	Trio	Termination	No	0.003472	25+3		Single congenital anomaly, genetic cause suspected	Isolated case for couple		Skeletal	Short long bone, Talipes, Thoracic hypoplasia, Long philtrum, Skeletal dysplasia	Candidate (GUS)	AR homozygous	CREB3L2	p.Gln186*	No OMIM disease gene				Full
PED168	Female	Trio	Termination	No	0.01159	22+6		Multiple congenital anomalies, genetic cause suspected	Isolated case for couple		Skeletal	Small placenta, Abnormality of the lower limb, Oligodactyly	Unresolved (NAD)
PED169	Male	Trio	Termination	Yes	-0.005942	24		Multiple congenital anomalies, genetic cause suspected	Isolated case for couple		Neurological	Ventriculomegaly, Horseshoe kidney	Solved (LP/P in OMIM gene)	AR homozygous	TRAPPC12	p.Gln149*	Encephalopathy, progressive, early-onset, with brain atrophy and spasticity (MIM:617669)	Partial overlap	Horseshoe kidney	Corpus callosal abnormalities	Partial		PMID: 28777934, 32369837
PED170	Female	Trio	Termination	No	0.0116	21		Multiple congenital anomalies, genetic cause suspected	Isolated case for couple		Muscular (incl. neuromuscular)	Fetal akinesia sequence, Multiple joint contractures, Pulmonary hypoplasia	Unresolved (NAD)
PED171	Male	Trio	Termination	No	0.0008453	21+0		Single congenital anomaly, genetic cause suspected	Isolated case for couple		Neurological	Dandy-Walker malformation, Agenesis of corpus callosum, Encephalocele	Unresolved (NAD)
PED172	Male	Trio	Termination	No	-0.04784	21		Single congenital anomaly, genetic cause suspected	Isolated case for couple		Urogenital	Hydronephrosis	Unresolved (NAD)
PED173	Male	Trio	Termination	No	-0.01593	20		Single congenital anomaly, genetic cause suspected	Isolated case for couple		Other	Bilateral cleft lip and palate	Candidate (VUS in OMIM gene)	AD inherited (M)	TP63	p.Ile225Thr	Orofacial cleft 8 (MIM:618149)				Full
PED174	Female	Trio	Neonatal death	No	0.03004	37+6	1	Unexplained neonatal death	Isolated case for couple		No abnormality detected		Unresolved (NAD)
PED175	Male	Trio	Miscarriage	Yes	0.07483	14		Unexplained fetal death	Recurrent for couple	2	No abnormality detected		Unresolved (NAD)
PED176	Female	Trio	Termination	No	-0.00285	20		Single congenital anomaly, genetic cause suspected	Isolated case for couple		Urogenital	Cystic renal dysplasia, Bicornuate uterus	Solved (LP/P in OMIM gene)	AD de novo	GATA3	p.Cys285Tyr	Hypoparathyroidism, sensorineural deafness, and renal dysplasia (MIM:146255)	All overlap			Full
PED177	Male	Trio	Neonatal death	No	0.01556	26+1		Multiple congenital anomalies, genetic cause suspected	Isolated case for couple		Respiratory	Pulmonary arterial hypertension	Candidate (VUS in OMIM gene)	XLR	ZIC3	p.Arg244Gln	VACTERL association, X-linked (MIM:314390)	No overlap			Uncertain
PED178	Male	Trio	Termination	No	-0.05196	25		Multiple congenital anomalies, genetic cause suspected	Isolated case for couple		Urogenital	Bilateral renal hypoplasia, Micrognathia, Intrauterine growth retardation	Solved (LP/P in OMIM gene)	AD de novo	ARCN1	p.Arg170*	Short stature, rhizomelic, with microcephaly, micrognathia, and developmental delay (MIM:617164)	All overlap			Full
PED179	Female	Trio	Miscarriage	No	0.01967	19+5		Multiple congenital anomalies, genetic cause suspected	Recurrent for couple	1	Lymphatic (incl. non-immune hydrops)	Hydrops fetalis, Abnormal facial shape, Intrauterine growth retardation, Cystic hygroma, Pleural effusion, Abnormal aortic valve morphology	Unresolved (NAD)
PED181	Female	Trio	Termination	No	-0.004517	17		Multiple congenital anomalies, genetic cause suspected	Isolated case for couple		Skeletal	Postaxial hand polydactyly, Preaxial foot polydactyly, Aplasia/Hypoplasia of the tibia, Low-set ears, Abnormal subclavian artery morphology, Intestinal malrotation, Abnormal lung lobation	Candidate (VUS in OMIM gene)	AR compound heterozygous	IFT122	c.2988-5G>A (p.?)/c.273-565C>G (P.?)	Cranioectodermal dysplasia 1 (MIM:218330)
PED183	Male	Trio	Termination	No	0.02715	13		Multiple congenital anomalies, genetic cause suspected	Isolated case for couple		Urogenital	Anal atresia, Scoliosis, Axillary pterygium, Megacystis, Webbed neck, Cystic renal dysplasia	Candidate (GUS)	AD de novo	PPARD	p.Lys398Arg	No OMIM disease gene				Uncertain
PED184	Male	Trio	Termination	Yes	0.1364	22		Multiple congenital anomalies, genetic cause suspected	Isolated case for couple		Urogenital	Bilateral renal agenesis, Talipes equinovarus, Low-set ears	Candidate (GUS)	AR homozygous	ENO3	p.Gly156Asp	No OMIM disease gene				Uncertain
PED186	Female	Trio	Termination	No	0.01235	14+		Single congenital anomaly, genetic cause suspected	Isolated case for couple		Neurological	Ventriculomegaly, Agenesis of corpus callosum, Micrognathia	Unresolved (NAD)
PED187	Male	Trio	Termination	No	-0.0103	21+5		Single congenital anomaly, genetic cause suspected	Isolated case for couple		Neurological	Ventriculomegaly, Hydranencephaly	Solved (LP/P in OMIM gene)	AD de novo	TUBA1A	p.Arg79Cys	Lissencephaly 3 (MIM:602529)	All overlap		lissencephaly (too early)	Full
PED188	Male	Quad	Termination	No	0.02316	23+3		Multiple congenital anomalies, genetic cause suspected	Other	1	Urogenital	Enlarged kidney, Renal cyst, Knee flexion contracture, Talipes calcaneovalgus, Anal atresia, Intestinal malrotation, Esophageal atresia, Laryngeal stenosis, Single umbilical artery,	Unresolved (NAD)
PED189	Male	Trio	Termination	No	-0.001772	21+1		Multiple congenital anomalies, genetic cause suspected	Isolated case for couple		Skeletal	Forearm reduction defects, Ectrodactyly, Syndactyly, 4-5 toe syndactyly, Cleft palate	Solved (LP/P in OMIM gene)	AD de novo	NIPBL	p.Asp1991Asn	Cornelia de Lange syndrome 1 (MIM:122470)	All overlap			Full		PMID: 15318302, PMID: 22740382, PMID: 22991273
PED190	Female	Trio	Termination	No	-0.04094	22		Multiple congenital anomalies, genetic cause suspected	Isolated case for couple		Neurological	Intrauterine growth retardation, Horseshoe kidney, Intraventricular hemorrhage, Hydrocephalus, Agenesis of corpus callosum, Gliosis, Subarachnoid hemorrhage, Abnormal lung lobation, Small placenta,	Unresolved (NAD)
PED191	Female	Trio	Stillbirth	No	-0.0002874	27		Unexplained fetal death	Isolated case for couple		Other	Intrauterine growth retardation, Talipes	Candidate (GUS)	AD de novo	PIK3C3	p.Gln504*	No OMIM disease gene				Uncertain
PED192	Female	Trio	Termination	No	0.0272	22+6		Multiple congenital anomalies, genetic cause suspected	Isolated case for couple		Neurological	Hypoplasia of the corpus callosum, Abnormal cortical gyration, Abnormality of neuronal migration	Unresolved (NAD)
PED194	Male	Trio	Stillbirth	No	-0.01973	21+2		Multiple congenital anomalies, genetic cause suspected	Isolated case for couple		Neurological	Ventriculomegaly, Periventricular nodular heterotopia, Macrocephaly	Unresolved (NAD)
PED195	Female	Trio	Neonatal death	No	-0.007299	34		Multiple congenital anomalies, genetic cause suspected	Isolated case for couple		Urogenital	Unilateral cleft lip, Unilateral cleft palate, Multicystic kidney dysplasia, Cerebellar hypoplasia, Hydronephrosis, Pulmonary hypoplasia	Unresolved (NAD)
PED196	Female	Quad	Termination	No	-0.006881	22		Single congenital anomaly, genetic cause suspected	Other		Neurological	Hydranencephaly	Unresolved (NAD)
PED197	Female	Trio	Termination	No	0.02037	18+2		Multiple congenital anomalies, genetic cause suspected	Isolated case for couple		Muscular (incl. neuromuscular), Skeletal	Congenital diaphragmatic hernia, Amelia involving the upper limbs	Unresolved (NAD)
PED198	Female	Trio	Neonatal death	No	0.01462	35+1	1	Multiple congenital anomalies, genetic cause suspected	Isolated case for couple		Global	Intrauterine growth retardation, Polyhydramnios, Tracheoesophageal fistula, Duodenal atresia, Anorectal anomaly, Pulmonary artery atresia, Ventricular septal defect, Transposition of the great arteries	Unresolved (NAD)
PED199	Male	Trio	Termination	No	-0.02338	22		Multiple congenital anomalies	Isolated case for couple		Cardiovascular	Polydactyly, Atrial septal defect, Upper airway obstruction, Postaxial polydactyly	Solved (LP/P in OMIM gene)	AD de novo	PRKACB	p.His135Leu	Multiple congenital abnormalities syndrome (PMID:33058759)	All overlap			Full
PED200	Male	Trio	Stillbirth	No	0.04479	24+5		Single congenital anomaly, genetic cause suspected	Recurrent for couple	1	Neurological	Ventriculomegaly, Subarachnoid hemorrhage, Intracranial hemorrhage, Hydrocephalus, Dilatation of the bladder	Solved (LP/P in novel phenotype)	XLR	ARSL	p.Glu407*	Chondrodysplasia punctata, X-linked recessive (MIM:302950)	death in utero described in 2 other cases and PED056
PED201	Male	Trio	Termination	No	-0.03675	16+3		Multiple congenital anomalies, genetic cause suspected	Isolated case for couple		Skeletal	Abnormal vertebral segmentation and fusion, Ventriculomegaly, Anal atresia, Unilateral renal agenesis	Unresolved (NAD)
PED203	Female	Trio	Termination	No	-0.01079	21+5		Multiple congenital anomalies, genetic cause suspected	Isolated case for couple		Neurological	Ventriculomegaly, Arnold-Chiari malformation, Neural tube defect, Lumbosacral meningocele	Unresolved (NAD)
PED204	Male	Trio	Termination	No	-0.02343	21		Single congenital anomaly, genetic cause suspected	Isolated case for couple		Cardiovascular	Thickened nuchal skin fold, Pulmonary artery atresia, Ventricular septal defect, Low-set ears, Erythema of the eyelids, Cervical ribs, Subarachnoid hemorrhage	Candidate (GUS)	AD de novo	FLT1	p.Tyr139*	No OMIM disease gene				Uncertain
PED205	Male	Trio	Termination	No	-0.0002828	15+4		Multiple congenital anomalies, genetic cause suspected	Isolated case for couple		Lymphatic (incl. non-immune hydrops)	Hydrops fetalis	Candidate (GUS)	AD de novo	RYR3	p.Tyr3263Cys	No OMIM disease gene				Uncertain
PED206	Female	Trio	Termination	No	-0.0686	22+3		Single congenital anomaly, genetic cause suspected	Isolated case for couple		Neurological	Ventriculomegaly, Cerebellar hypoplasia, Hypoplasia of the corpus callosum	Unresolved (NAD)
PED207	Male	Trio	Neonatal death	No	0.03301	N/A		Multiple congenital anomalies	Isolated case for couple		Global	Semi-lobar holoprosencephaly, Hypertelorism, Micrognathia Midline cleft lip and palate, Low set ears, Occipital cyst, Large polycystic kidney right, Atrophic kidney left, Hypoplastic lungs, absent lung lobation, Absent adrenal glands	Solved (LP/P in OMIM gene)	AD de novo	KMT2D	p.Gln2014*	Kabuki Syndrome (MIM:147920)	All overlap			Full
PED208	Male	Trio	Termination	No	0.002316	26		Multiple congenital anomalies, genetic cause suspected	Isolated case for couple		Skeletal	Fibular aplasia, Tibial bowing, Foot oligodactyly, Syndactyly	Unresolved (NAD)
PED210	Male	Trio	Termination	No	0.008336	23		Multiple congenital anomalies, genetic cause suspected	Isolated case for couple		Skeletal	Lethal skeletal dysplasia, Sex reversal	Unresolved (NAD)
PED211	Female	Trio	Stillbirth	No	0.007629	20+0		Single congenital anomaly, genetic cause suspected	Isolated case for couple		Lymphatic (incl. non-immune hydrops)	Hydrops fetalis, Intrauterine growth retardation	Unresolved (NAD)
PED214	Male	Trio	Termination	No	-0.03928	32+5		Single congenital anomaly, genetic cause suspected	Isolated case for couple		Neurological	Microcephaly, Encephalomalacia, Ventriculomegaly	Candidate (VUS in OMIM gene)	AR compound heterozygous	WDR81	p.Arg456Trp/p.Tyr1281*	Hydrocephalus, congenital, 3, with brain anomalies (MIM: 617967)	Ventriculomegaly overlaps
PED215	Female	Trio	Termination	No	0.04914	19+3		Multiple congenital anomalies, genetic cause suspected	Isolated case for couple		Neurological	Micrognathia, Cleft palate, Low-set ears, Brain imaging abnormality, Hypoplasia of the corpus callosum, Cerebellar hypoplasia	Unresolved (NAD)
PED216	Female	Trio	Termination	No	0.03912	22		Single congenital anomaly, genetic cause suspected	Isolated case for couple		Neurological	Dandy-Walker malformation, Polymicrogyria, Periventricular nodular heterotopia, Hypoplasia of the corpus callosum	Candidate (VUS in OMIM gene)	AD de novo	PTCH1	p.Glu1438Lys	Holoprosencephaly 7 (OMIM: 610828	Hypoplasia of the corpus callosum overlaps
PED217	Female	Trio	Termination	No	0.0385	23		Multiple congenital anomalies, genetic cause suspected	Isolated case for couple		Cardiovascular	Atrial septal defect, Double outlet right ventricle, Transposition of the great arteries, Single ventricle, Pulmonic stenosis, Asplenia, Bilateral trilobed lungs	Candidate (GUS)	AD de novo	GUCY1B1	p.Val510Leu	No OMIM disease gene
PED219	Female	Trio	Stillbirth	No	-0.03714	21+5		Unexplained fetal death	Isolated case for couple		Other	Stillbirth	Unresolved (NAD)
PED221	Female	Trio	Neonatal death	No	0.01161	36		Unexplained neonatal death	Isolated case for couple		Gastrointestinal	Hepatocellular necrosis, Hepatic necrosis, Hepatic fibrosis, Abnormal hepatic iron concentration, Cerebral ischemia	Candidate (GUS)	AR compound heterozygous	LATS2	p.Pro427Ser/p.Ala692Thr	No OMIM disease gene
PED222	Female	Trio	Termination	No	0.001147	14+2		Single congenital anomaly, genetic cause suspected	Isolated case for couple		Skeletal	Short fetal femur length, Femur fracture	Unresolved (NAD)
PED225	Female	Trio	Neonatal death	No	-0.02837	38		Multiple congenital anomalies, genetic cause suspected	Isolated case for couple		Global	Hypernatremic dehydration, Bone marrow hypocellularity, Microvesicular hepatic steatosis, Cholestasis	Candidate (GUS)	AD de novo	ASAP2	p.Thr843AlafsTer?	No OMIM disease gene
PED226	Male	Trio	Termination	No	-0.02492	19+2		Multiple congenital anomalies, genetic cause suspected	Isolated case for couple		Cardiovascular	Double outlet right ventricle with subaortic ventricular septal defect without pulmonary stenosis, Hypoplastic left heart, Syndactyly, Abnormal lung lobation, Dilatation of the renal pelvis	Solved (LP/P in OMIM gene)	AD de novo	FGFR2	p.Pro253Arg	Apert Syndrome (MIM:101200)	All overlap			Full
PED227	Male	Trio	Termination	No	-0.03215	22		Multiple congenital anomalies, genetic cause suspected	Isolated case for couple		Global	Cleft lip, Cleft palate, Abnormality of the ear, Clinodactyly, Renal hypoplasia/aplasia	Unresolved (NAD)
PED228	Male	Trio	Termination	No	-0.0119	23		Multiple congenital anomalies, genetic cause suspected	Isolated case for couple		Neurological	Microcephaly, Basal ganglia necrosis, Aplasia/Hypoplasia of the corpus callosum, Renal hypoplasia, Cerebral hemorrhage	Unresolved (NAD)
PED229	Female	Trio	Termination	No	-0.01384	19+5		Multiple congenital anomalies, genetic cause suspected	Isolated case for couple		Neurological	Agenesis of corpus callosum, Cerebellar hypoplasia, Periventricular gray matter heterotopia	Unresolved (NAD)
PED230	Male	Trio	Termination	No	0.009618	22		Single congenital anomaly, genetic cause suspected	Isolated case for couple		Neurological	Partial agenesis of the corpus callosum, Absent septum pellucidum, Periventricular nodular heterotopia	Unresolved (NAD)
PED231	Female	Trio	Termination	No	-0.2161	26+4		Multiple congenital anomalies, genetic cause suspected	Isolated case for couple		Neurological	Microcephaly, Hypoplastic aortic arch, Ventricular septal defect, Congenital finger flexion contractures	Solved (LP/P in OMIM gene)	AR compound heterozygous	OSGEP	p.Arg186*/p.Arg247Gln	Galloway-Mowat syndrome 3 (MIM:617729)	All overlap		Hypoplastic aortic arch, Ventricular septal defect,	Full
PED233	Female	Trio	Termination	No	0.01871	24		Multiple congenital anomalies, genetic cause suspected	Isolated case for couple		Other	Pierre-Robin sequence, Short long bone	Solved (LP/P in OMIM gene)	AD inherited (M)	COL2A1	p.Cys1289Profs*3	Stickler syndrome, type 1 (MIM:108300)	All overlap			Full
PED234	Male	Trio	Stillbirth	No	0.02642	34+4		Single congenital anomaly, genetic cause suspected	Isolated case for couple		Neurological	Agenesis of corpus callosum, Ventriculomegaly, Cerebellar hypoplasia	Candidate (VUS in OMIM gene)	XLR	ATRX	p.Asn671Tyr	Mental retardation-hypotonic facies syndrome, X-linked (MIM:309580)
PED235	Female	Trio	Termination	No	0.03293	20+6		Multiple congenital anomalies, genetic cause suspected	Isolated case for couple		Cardiovascular	Pulmonary artery atresia, Tetralogy of Fallot with pulmonary atresia, Ventricular septal defect, Overriding aorta, Persistent left superior vena cava, Single umbilical artery, Thoracic hemivertebrae	Unresolved (NAD)
PED236	Male	Trio	Termination	No	-0.03506	27+2		Multiple congenital anomalies, genetic cause suspected	Isolated case for couple		Urogenital	Intrauterine growth retardation, Ambiguous genitalia, male	Unresolved (NAD)
PED239	Female	Trio	Termination	No	-0.03145	34+0		Single congenital anomaly, genetic cause suspected	Isolated case for couple		Neurological	Hydrocephalus	Unresolved (NAD)
PED240	Male	Trio	Termination	No	-0.02115	15+0		Multiple congenital anomalies, genetic cause suspected	Recurrent for couple	1	Urogenital	Bilateral renal agenesis, 4-5 toe syndactyly, Vertebral segmentation defect	Unresolved (NAD)
PED242	Female	Trio	Termination	No	0.001436	34+2		Multiple congenital anomalies, genetic cause suspected	Isolated case for couple		Urogenital	Abnormality of the genitourinary system, Bilateral renal hypoplasia, Fetal megacystis, Abnormality of the uterus, Pulmonary hypoplasia	Unresolved (NAD)

## Sheet: Supplementary Table 3
Pedigree ID	Diagnostic Status	Inheritance	Gene symbol	Genomic change(s) hg19 (GRCh37)	Main Transcript	Used transcript classification	cDNA change(s)	Amino acid change(s)	Gene-Disease relationship	ACMG classification	ACMG criteria applied
PED001	Solved (LP/P in OMIM gene)	AR homozygous	FGFR2	Chr10:123279668C>T	NM_000141.4	NM_022970	NM_000141.4:c.764G>A	p.Arg255Gln	Strong (expansion)	Likely Pathogenic (4)	PS3, PM2, PP1, PP3
PED002	Candidate (VUS in novel inheritance) Candidate (GUS)	AR homozygous AR homozygous	DNAJB11 TMEM212	Chr3:186302209G>A Chr3:171571428G>A	NM_016306.6 NM_001164436	NM_016306.6 NM_001164436	NM_016306.6:c.853-10G>A NM_001164436:c.331G>A	p.? p.Gly111Arg
PED003	Candidate (GUS)	AR homozygous	UBR4	Chr1:19504199A>T	NM_020765.3	NM_020765.3	NM_020765.3:c.2393T>A	p.Val789Glu	N/A Novel gene
PED005	Solved (LP/P in OMIM gene)	AR compound heterozygous	MKS1	Chr17:56288019C>A Chr17:56283916_56283944del	NM_017777.4	NM_017777.4	NM_017777.4:c.1024+1G>T NM_017777.4:c.1408-34_1408-6del29	p.? p.?	Strong	Pathogenic (5) Pathogenic (5)	PVS1, PM2, PM3 PVS1, PS4, PM3
PED007	Solved (LP/P in novel gene)	AR compound heterozygous	MDFIC	Chr7:114619728 C>CA Chr7:g114655980 T>G	NM_001166345.1	NM_001166345.3	NM_001166345.1:c.391dup NM_001166345.1:c.732T>G	p.Met131fs* p.Phe244Leu	None (Novel gene)	Pathogenic (5) Likely Pathogenic (4)	PS3, PS4, PP1_Moderate PM2, PM3, PP1, PP3
PED008	Solved (LP/P in OMIM gene)	AD inherited	ABCC8	Chr11:17414656A>G	NM_000352.6	ENST00000302539.4	NM_000352.6:c.4628T>C	p.Leu1543Pro	Moderate	Likely Pathogenic (4)	PS3, PM2, PP3
PED012	Solved (LP/P in OMIM gene)	AR compound heterozygous	B3GAT3	Chr11:62384214G>A Chr11:62384572G>A	NM_012200.4	NM_012200.4	NM_012200.4:c.505C>T NM_012200.4:c.673C>T	p.Arg169Trp p.Arg225*	Limited (expansion)	Pathogenic (5) Pathogenic (5)	PS3, PM2, PM3, PP1, PP3 PVS1, PS3, PM2, PM3, PP1
PED013	Solved (LP/P in OMIM gene)	AR compound heterozygous	PIBF1	Chr13:73401909 G>A Chr13:73402011_73402023del13	NM_006346.4	NM_006346.4	NM_006346.4:c.954G>A NM_006346.4:c1056_1068del	p.Val306fs* p.Lys353fs*	Moderate	Pathogenic (5) Pathogenic (5)	PVS1, PM2, PM3 PVS1, PM2, PM3
PED014	Solved (LP/P in OMIM gene)	AD de novo (phased paternal, no mosaicism detected)	RIT1	Chr1:155874589 G>C	NM_006912.6	NM_001256821.1	NM_006912.6:c.170C>G	p.Ala57Gly	Definitive	Pathogenic (5)	PS1, PS2, PS3, PS4,
PED017	Solved (LP/P in OMIM gene)	AR compound heterozygous	TPI1	Chr12:6978338 G>C Chr12:6979212 G>C	NM_000365.6	NM_001159287.1	NM_000365.6:c.315G>C NM_000365.6:c.544-1G>C	p.E105D p.?	Strong (expansion)	Pathogenic (5) Pathogenic (5)	PS1, PS4, PM3 PVS1, PM2, PM3
PED018	Solved (LP/P in OMIM gene)	AD de novo (Insufficient sample for phasing, no mosaicism detected)	ARID1B	Chr6:157522264_157522271delGCCTTCTC	NM_001374828.1	NM_017519.2	NM_017519.2:c.4497_4504delGCCTTCTC/wt	p.Trp1499*	Definitive	Pathogenic (5)	PVS1, PS2, PM2
PED023	Solved (LP/P in OMIM gene)	AR compound heterozygous	NDE1	Chr16:15788044delG Chr16:15788051dupC	NM_017668.3	NM_017668.3	NM_017668.3:c.726delG NM_017668.3:c.733dupC	p.Thr243Profs*115 p.Leu245Profs*70	Strong	Pathogenic (5) Pathogenic (5)	PVS1, PM2, PM3 PVS1, PM2, PM3
PED024	Solved (LP/P in novel phenotype)	AR compound heterozygous	EIF2B2	Chr14:75470103 G>T Chr14:75471520 C>T	NM_014239.4	NM_014239.4	NM_014239.4:c.284+5G>T NM_014239.4:c.514C>T	p.? p.Arg172*	Limited (expansion)	Likely Pathogenic (4) Likely Pathogenic (4)	PS3_Supporting, PM2, PM3, PP1, PP3 PVS1_Strong, PM2, PP1
PED026	Candidate (GUS)	AR compound heterozygous	KIF26A	Chr14:104640615 C>T Chr14:104643801 C>T	NM_015656.2	NM_015656.2	NM_015656.2:c.2161C>T NM_015656.2:c.4676C>T	p.Arg721Cys p.Ala1559Val	N/A Novel gene
PED029	Candidate (VUS in OMIM gene)	AR homozygous	SIK3	Chr11:116746643C>T	NM_001366686.3	NM_025164.6	NM_001366686.3:c.1178G>A	p.Arg393His		VUS (3)	PM2, PP3, PP1
PED030	Candidate (VUS in novel inheritance and phenotype)	XLR (digenic) AD de novo (digenic) (phased paternal, no mosaicism detected)	FLNA FLNC	ChrX:153583294 C>T Chr7:128494901 C>T	NM_001110556.2	NM_001110556.2	NM_001110556.2:c.5116G>A NM_001458.5:c.7070C>T	p.Gly1706Ser p.Ala2357Val	N/A novel inheritance
PED031	Solved (LP/P in OMIM gene)	AR compound heterozygous	NEB	Chr2:152460215_152460216 delCA Chr2:152397282 delG	NM_001164508.2	NM_001164508.2	NM_001164508.2:c.13130_13131delTG NM_001164508.2:c20719delC	p.Met4377Lysfs*11 p.His6907Ilefs*11	Definitive (expansion)	Pathogenic (5) Pathogenic (5)	PVS1, PM2, PM3 PVS1, PM2, PM3
PED033	Solved (LP/P in OMIM gene)	AD de novo (phased paternal, no mosaicism detected)	NALCN	Chr13:101726998 G>A	NM_052867.4	NM_052867.4	NM_052867.4:c.3970C>T/wt	p.Leu1324Phe	Strong	Likely Pathogenic (4)	PS2, PM2, PP2, PP3
PED035	Candidate (GUS)	XLR	PLXNA3	ChrX:153689074 G>A	NM_017514.5	NM_017514.5	NM_017514.5:c.551G>A	p.Arg184His	N/A Novel gene
PED038	Candidate (GUS)	AD de novo (phased paternal, no mosaicism detected)	KDM5A	Chr12:498236C>T	NM_001042603.3	NM_001042603.3	NM_001042603.3:c.22G>A	p.Gly8Ser	N/A Novel gene
PED040	Candidate (VUS in novel phenotype)	AR compound heterozygous	LAMC3	Chr9:133914340 C>T Chr9:133943597 A>G	NM_006059.4	NM_006059.4	NM_006059.4:c.1066C>T NM_006059.4:c.2726A>G	p.Arg356Cys p.Gln909Arg	N/A novel phenotype
PED042	Solved (LP/P in OMIM gene)	AR homozygous	CANT1	Chr17:76991292 C>T	NM_001159773.2	NM_001159773.2	NM_001159773.2:c.643G>A	p.Glu215Lys	Strong	Likely Pathogenic (4)	PS3, PM2, PP1, PP3
PED043	Solved (LP/P in OMIM gene)	AD paternal mosaic 10 blood - 20% sperm	PBX1	Chr1:164761784 C>T/wt	NM_002585.4	NM_001204961.1	NM_002585.4:c.319C>T/wt	p.Arg107Trp	Strong	Likely Pathogenic (4)	PS2, PM2, PP1, PP3
PED044	Solved (LP/P in novel gene)	AD de novo (phased paternal, no mosaicism detected)	GNB2	Chr7:100275036A>G/wt	NM_005273.4	NM_005273.3	NM_005273.4:c.265A>G	p.Lys89Glu	Limited (Novel gene)	Novel gene/inheritance model; unable to classify
PED045	Candidate (GUS)	AR compound heterozygous	ZFHX3	Chr16:72822563TTG C>T Chr16:72821301 G>A	NM_006885.4	NM_006885.4	NM_006885.4:c.9609_9611delGCA NM_006885.4:c.10874C>T	p.Gln3204del p.Ser3625Leu	N/A Novel gene
PED046	Solved (LP/P in OMIM gene)	AD de novo (dual diagnosis) (phased maternal, no mosaicism detected) AD de novo (dual diagnosis) (phased maternal, ddPCR assay design failed)	KMT2D SOS2	Chr12:49434567 delG Chr14:50647376 T>C	NM_003482.4 NM_006939.4	NM_003482.4 NM_006939.3	NM_003482.3:c.6991delC NM_006939.4:c.883A>G	p.Leu2331* p.Thr295Ala	Definitive Definitive	Pathogenic (5) Likely Pathogenic (4)	PVS1, PS2, PS3, PM2 PS2, PM2, PP2
PED049	Candidate (VUS in OMIM gene)	AD inherited	KCNJ2	Chr17:68172325 T>G	NM_000891.3	NM_000891.3	NM_000891.3:	c.1145T>G	Moderate	VUS (3)	PM2, PP3
PED051	Candidate (VUS in OMIM gene)	AD inherited	ZFPM2	Chr8:106573579_106595687dup (CNV)	NM_012082.4	NM_012082.4	NM_012082.4	p.?	Limited (CNV)	VUS (3)	PM2, PP1
PED053	Solved (LP/P in OMIM gene)	AD de novo (no informative SNP for phasing, no mosaicism detected)	HNF1B	Chr17:36104530_36104533delACCT	NM_000458.4	NM_000458.4	NM_000458.4:c.344+2_344+5delTAGG	p.?	Definitive	Pathogenic (5)	PVS1, PS2, PM2,
PED054	Solved (LP/P in OMIM gene)	AD de novo (phased paternal, no mosaicism detected)	ARID1A	Chr1:27097817 G>T	NM_006015.6	NM_006015.6	NM_006015.6:c.3406G>T	p.Ala1136Ser	Definitive	Likely Pathogenic (4)	PS2, PM2, PP3
PED056	Solved (LP/P in novel phenotype)	XLR	ARSL	ChrX:2856218 G>A	NM_000047.3	NM_000047.3	NM_000047.2:c.1207C>T	p.Arg403*	Limited (expansion)	Likely Pathogenic (4)	PVS1, PM2
PED057	Solved (LP/P in OMIM gene)	AD de novo (phased maternal, no mosaicism detected)	NIPBL	Chr5:37057313 A>G	NM_133433.4	NM_133433.4	NM_133433.4:c.7289A>G	p.Tyr2430Cys	Definitive	Pathogenic (5)	PS1, PS2, PM2
PED060	Candidate (GUS)	AR homozygous	FLII	Chr17:18149133 A>T	NM_002018.4	NM_002018.4	NM_002018.3:c.3428T>A	p.Phe1143Tyr	N/A Novel gene
PED063	Solved (LP/P in OMIM gene)	AD de novo (insufficient sample for phasing, no mosaicism detected)	SAMD9	Chr7:92732940 C>T	NM_017654.4	NM_017654.4	NM_017654.3:c.2471G>A	p.Arg824Gln	Strong	Pathogenic (5)	PS2, PS3, PS4, PP4
PED066	Candidate (VUS in novel phenotype)	AD de novo	TBX5 & TBX3	Chr12:13966325_115953872dup (CNV)	NM_005996.4, NM_181486.4				N/A novel phenotype
PED069	Solved (LP/P in OMIM gene)	XLR de novo (phased maternal, no mosaicism detected)	HUWE1	ChrX:53595832 A>C	NM_031407.7	NM_031407.7	NM_031407.7:c.6527T>G	p.Leu2176Arg	Strong	Likely Pathogenic (4)	PS2, PM2, PP2, PP3
PED071	Candidate (VUS in OMIM gene)	XLR	AIFM1	ChrX:129299623 C>T	NM_004208.4	NM_004208.3	NM_004208.4:c.8G>A	p.Arg3Gln	Moderate	VUS (3)	PM2, PP3
PED073	Candidate (VUS in OMIM gene)	AR compound heterozygous	KIAA0586	Chr14:58920101 A>G Chr14:58924682 C>T	NM_001329943.3	NM_001244189.1	NM_001329943.3c.1163A>G NM_001329943.3:c.1568C>T	p.Asn388Ser p.Ala523Val	Moderate	VUS (3) VUS (3)	PM2, PM2, PP3
PED074	Solved (LP/P in OMIM gene)	AD de novo (phased paternal, no mosaicism detected)	SMARCB1	Chr22:24176339 G>A	NM_003073.5	NM_003073.5	NM_003073.5:c.1130G>A	p.Arg377His	Strong	Pathogenic (5)	PS1, PS2, PS4
PED075	Candidate (GUS)	AR compound heterozygous	HELZ2	Chr20:62198553 G>C Chr20:62197432 C>T	N/A	NM_001037335.2	NM_001037335.2:c.2158C>G NM_001037335.2:c.2743G>A	p.Leu720Val p.Ala915Thr	N/A Novel gene
PED077	Candidate (VUS in OMIM gene)	AR compound heterozygous	TAF2	Chr8:120814251 C>A Chr8:120774682 G>A	NM_003184.4	NM_003184.4	NM_003184.3:c.575G>T NM_003184.3:c.2531C>T	p.Cys192Phe p.Pro844Leu	Moderate	VUS (3) VUS (3)	PM2, PP3 PM2, PP3
PED078	Candidate (VUS in novel phenotype)	XLR	BCORL1	ChrX:129190051 C>G	NM_001379451.1	NM_021946.4	NM_001379451.1:c.5076C>G	p.Tyr1692*	N/A novel phenotype
PED084	Solved (LP/P in OMIM gene)	AD paternal mosaic 2-3%	TUBA1A	Chr12:49580430 G>A	NM_006009.4	NM_006009.3	NM_006009.4:c.190C>T	p.Arg64Trp	Strong	Pathogenic (5)	PS1, PS2, PM2
PED085	Solved (LP/P in OMIM gene)	AD de novo (phased paternal, no mosaicism detected)	RAF1	Chr3:12626123 G>C	NM_001354689.3	NM_002880.3	NM_001354689.3:c.1897C>G	p.Leu613Val	Definitve	Pathogenic (5)	PS1, PS2, PS3, PS4
PED086	Solved (LP/P in OMIM gene)	AD de novo (phased paternal, no mosaicism detected)	GREB1L	Chr18:19102624 dupA	NM_001142966.3	NM_001142966.2	NM_001142966.2:c.5614dupA	p.Thr1872Asnfs*24	Strong	Pathogenic (5)	PVS1, PS2, PM2
PED088	Candidate (GUS)	AR compound heterozygous	KDM2B	Chr12:121880581 C>G Chr12:121880461 T>A	NM_032590.5	NM_032590.4	NM_032590.5:c.2663G>C NM_032590.5:c.2783A>T	p.Arg888Pro p.Glu928Val	N/A Novel gene
PED091	Solved (LP/P in OMIM gene)	AD de novo (phased paternal, no mosaicism detected)	MAP2K2	Chr19:4101102 T>G	NM_030662.4	NM_030662.3	NM_030662.4:c.620A>C	p.Glu207Ala	Definitive	Likely Pathogenic (4)	PS2, PM2, PP2, PP3
PED093	Solved (LP/P in OMIM gene)	AD de novo (phased maternal, no mosaicism detected)	PTPN11	Chr12:112888202 C>T	NM_002834.5	NM_002834.4	NM_002834.5:c.218C>T	p.Thr73Ile	Definitive	Pathogenic (5)	PS1, PS2, PS3, PS4
PED096	Candidate (GUS)	AR homozygous	EMR3	Chr19:14772773 A>C	NM_032571.5	NM_032571.5	NM_032571.5:c.355+2T>G	p.?	N/A Novel gene
PED098	Solved (LP/P in OMIM gene)	AR compound heterozygous	POLG	Chr15:89872271 C>T Chr:15:89870432 C>T	NM_002693.3	NM_002693.2	NM_002693.3:c.926G>A NM_002693.3:c.1399G>A	p.Arg309His p.Ala467Thr	Strong (expansion)	Pathogenic (5) Pathogenic (5)	PS1, PS3, PS4, PM3 PS1, PS3, PM2, PM3
PED102	Candidate (VUS in OMIM gene)	AD de novo (phased paternal, no mosaicism detected) AD de novo (phased paternal, 0.06% mosaicism in blood)	SIN3A ALAS2	Chr15:75702557 delG ChrX:55052403 A>C	NM_001145358.2 NM_000032.5	NM_001145358.1	NM_001145358.1:c.1081delC NM_000032.5:c.31T>G	p.Gln361ArgfsTer29 p.Cys11Gly	Moderate Moderate	Pathogenic (5) VUS(3)	PVS1, PS2, PM2 PS2, PM2, PP3
PED103	Solved (LP/P in OMIM gene)	AD de novo (phased maternal, no mosaicism detected)	DDX3X	ChrX:41206199 C>T	NM_001356.5	NM_001356.4	NM_001356.5:c.1703C>T	p.Pro568Leu	Definitive (expansion)	Pathogenic (5)	PS1, PS2, PM2, PP2
PED104	Solved (LP/P in OMIM gene)	AD inherited (Maternal) AD inherited (Maternal)	MECOM RYR2	Chr3:168830571 T>A Chr1:237947538 G>A	NM_004991.4 NM_001035.3	NM_001105077.3 NM_001035.2	NM_004991.4:c.2577+4A>T NM_001035.2:c.12526G>A	p.? p.Val4176Met	Moderate (MECOM)	Likely Pathogenic Likely Pathogenic	PVS1_strong, PM2 PS1, PM1, and PM2
PED107	Candidate (VUS in OMIM gene)	AR compound heterozygous	VARS	Chr6:31759456 G>T Chr6:31747470 G>A	NM_006295.3	NM_006295.2	NM_006295.2:c.1031C>A NM_006295.2:c.3203C>T	p.Pro344His p.Thr1068Met	Strong	VUS (3) Likely Pathogenic (4)	PM2, PM3_Supporting, PP1, PP3 PM1, PM2, PP1, PP3
PED109	Candidate (VUS in OMIM gene)	AR compound heterozygous	TOE1	Chr1:45806853 C>T Chr1:45808796 C>T	NM_025077.4	ENST00000372090.5	NM_025077.4:c.161C>T NM_025077.4:c.955C>T	p.Ala54Val p.His319Tyr	Moderate	VUS (3) VUS (3)	PM2, PP3 PM2, PS1_Moderate, PP5
PED110	Candidate (GUS)	AR homozygous	HEATR5B	Chr2:37247802 G>GC	NM_019024.3	NM_019024.3	NM_019024.3:c.4030dupG	p.Ala1344Glyfs*2	N/A Novel gene
PED113	Candidate (VUS in novel phenotype)	AR compound heterozygous	NUP85	Chr17:73227449 A>G Chr17:73229227 T>C	NM_024844.5	ENST00000245544.4	NM_024844.5:c.1109A>G NM_024844.5:c.1589T>C	p.Asn370Ser p.Met530Thr	N/A novel phenotype
PED114	Candidate (VUS in novel phenotype)	AR compound heterozygous	UNC13D	Chr17:73836152 C>T Chr17:73829110 A>G	NM_199242.3	ENST00000207549.4	NM_199242.3:c.898G>A NM_199242.3:c.2384T>C	p.Val300Met p.Met795Thr	N/A novel phenotype
PED115	Candidate (VUS in novel phenotype)	XLR	SLC9A7	ChrX:46513159 C>G	NM_001257291.2	ENST00000328306.4	NM_032591.3:c.1030-1G>C	p.?	N/A novel phenotype
PED116	Solved (LP/P in OMIM gene)	AR compound heterozygous	ADAMTSL2	Chr9:136404921 G>A Chr9:136419600 delG	NM_014694.4	NM_001145320.1	NM_014694.4:c.338G>A NM_014694.4:c.1061delG	p.Arg113His p.Gly354Alafs*7	Moderate	Pathogenic (5) Pathogenic (5)	PS1, PS3, PM2 PVS1, PM2, PM3
PED117	Candidate (VUS in novel phenotype)	XLR	TRPC5	ChrX:111097043 G>T	NM_012471.3	NM_012471.2	NM_012471.3:c.1192C>A	p.Pro398Thr	N/A novel phenotype
PED118	Candidate (VUS in OMIM gene)	AR compound heterozygous (maternal p.D160H de novo p.Q228*) (p.Q228* phased paternal, no mosaicism detected)	TOR1AIP1	Chr1:179853829 G>C Chr1:179870457 C>T	NM_015602.4	NM_001267578.1	NM_015602.3:c.478G>C NM_015602.3:c.673C>T	p.Asp160His p.Gln226*	Moderate	VUS (3) Pathogenic (5)	PM2, PP3, BP1 PVS1, PS2 and PM2
PED119	Solved (LP/P in OMIM gene)	AD de novo (phased paternal, no mosaicism detected)	LZTR1	Chr22:21346027G>T	NM_006767.4	ENST00000215739.8	NM_006767.4:c.902G>T	p.Gly301Val	Definitive	Likely Pathogenic (4)	PS2, PM2, PP2, PP3
PED121	Solved (LP/P in OMIM gene)	AD inherited (M)	FOXF1	Chr16:86545056_86545077 dup	NM_001451.3	ENST00000262426.4	NM_001451.3:c.881_902dup	p.Gly302Profs*46	Definitive	Pathogenic (5)	PVS1, PM2, PP1
PED122	Candidate (VUS in OMIM gene)	AD de novo (phased paternal, no mosaicism detected)	TTN	Chr2:179455719 G>A	NM_001267550.2	ENST00000589042.1	NM_001267550.2:c.60733C>T	p.Arg20245*	Strong	Likely Pathogenic (4)	PVS1_Strong and PM2
PED128	Candidate (GUS)	AD de novo (phased paternal, no mosaicism detected)	PROX1	Chr1:214170270 A>G	NM_001270616.2	ENST00000366958.4	NM_001270616.2:c.392A>G	p.Asn131Ser	N/A Novel gene
PED129	Candidate (GUS)	AR compound heterozygous	DNAH14	Chr1:225477608 A>G Chr1:225569142 G>A	NM_001367479.1	ENST00000430092.1	NM_001367479.1:c.8293A>G NM_001367479.1:c.12938G>A	p.Lys2765Glu p.Arg4313Gln	N/A Novel gene
PED131	Candidate (VUS in novel inheritance)	AR homozygous	COG4	Chr16:70531202 C>T	NM_015386.3	ENST00000323786.5	NM_015386.3:c.1403G>A	p.Arg468Gln	Limited	VUS(3)	PM2, PP3, PP1
PED132	Candidate (GUS)	AR compound heterozygous	RAPH1	Chr2:204313459 G>A Chr2:204306081 G>A	NM_213589.3	ENST00000319170.5	NM_213589.3:c.1512+2C>T NM_213589.3:c.1832C>T	p.? p.Pro611Leu	N/A Novel gene
PED135	Candidate (GUS)	AD de novo (insufficient sample for phasing, no mosaicism detected)	SIN3B	Chr19:16986932 C>T	NM_001297595.2	ENST00000379803.1	NM_001297595.2:c.2659C>T	p.Arg887Trp	N/A Novel gene
PED138	Solved (LP/P in OMIM gene)	AR homozygous	PKHD1	Chr6:51921499 G>A	NM_138694.4	ENST00000371117.3	NM_138694.4:c.1690C>T	p.Arg564*	Strong	Pathogenic (5)	PVS1, PM2, PP1
PED144	Candidate (VUS in novel phenotype)	AD de novo (phased paternal, no mosaicism detected)	CACNA1E	Chr1:181549838 G>C	NM_001205293.3	ENST00000367573.2	NM_001205293.3:c.877G>C	p.Asp293His	N/A novel phenotype
PED145	Candidate (VUS in OMIM gene)	AR homozygous	MMP9	Chr20:44642840 G>A	NM_004994.3	ENST00000372330.3	NM_004994.3:c.1828G>A	p.Val610Met	Limited	VUS(3)	PM2
PED154	Candidate (VUS in OMIM gene)	AR compound heterozygous	DHX37	Chr12:125465258 C>CTCCGAT Chr12:125438455 C>T	NM_032656.4	NM_032656.4	NM_032656.4:c.510_515dupATCGGA NM_032656.4:c.2666G>A	p.Glu172_L173_insSerGlu p.Arg889Gln	Moderate	VUS (3) VUS (3)	PM2, PM4 PM2, PP3
PED156	Solved (LP/P in OMIM gene)	AD de novo (phased maternal, no mosaicism detected)	ACTA1	Chr1:229567644 C>T	NM_001100.4	ENST00000366684.3	NM_001100.4:c.814G>A	p.Glu272Lys	Strong	Likely Pathogenic (4)	PS2, PM2, PP2, PP3
PED157	Solved (LP/P in OMIM gene)	AD de novo (phased maternal, no mosaicism detected)	USP9X	ChrX:40996242 CTT>C	NM_001039591.3	ENST00000324545.8	NM_001039591.3:c.623_624delTT	p.Phe208Cysfs*?	Strong	Pathogenic (5)	PVS1, PS2, PM2
PED158	Solved (LP/P in OMIM gene)	AD de novo (phased paternal, no mosaicism detected)	ACTA1	Chr1:229568037 C>T	NM_001100.4	ENST00000366684.3	NM_001100.4:c.596G>A	p.Gly199Asp	Strong	Likely Pathogenic (4)	PS2, PM2, PP2, PP3
PED162	Candidate (GUS)	AD de novo (insufficient sample for phasing, assay design failed)	EWSR1	Chr22:29678453 T>A	NM_005243.4	NM_005243.4	NM_005243.4:c.488T>A	p.Leu169Gln	N/A Novel gene
PED165	Solved (LP/P in OMIM gene)	AD de novo (No informative SNP for phasing, no mosaicism detected)	USP9X	ChrX:41082640 C>T	NM_001039591.3	ENST00000324545.8	NM_001039591.3:c.6736C>T	p.Gln2246*	Strong	Pathogenic (5)	PVS1_Strong, PS2, PM2
PED167	Candidate (GUS)	AR homozygous	CREB3L2	Chr7:137597764G>A	NM_194071.4	ENST00000330387.6	NM_194071.4:c.556C>T	p.Gln186*	N/A Novel gene
PED169	Solved (LP/P in OMIM gene)	AR homozygous	TRAPPC12	Chr2:3391839 C>T	NM_016030.6	ENST00000324266.5	NM_016030.6:c.445C>T	p.Gln149*	Moderate	Likely Pathogenic (4)	PVS1_Strong, PM2, PP3,
PED173	Candidate (VUS in OMIM gene)	AD inherited (M)	TP63	Chr3:189582115 T>C	NM_003722.5	NM_003722.5	NM_003722.5:c.674T>C	p.Ile225Thr	Moderate	VUS (3)	PM1, PP3
PED176	Solved (LP/P in OMIM gene)	AD de novo (phased paternal, no mosaicism detected)	GATA3	Chr10:8106031 G>A	NM_001002295.2	NM_001002295.2	NM_001002295.2:c.854G>A	p.Cys285Tyr	Definitive	Likely Pathogenic (4)	PS1, PM1, PM2, PP3
PED177	Candidate (VUS in OMIM gene)	XLR	ZIC3	ChrX:136649581 G>A	NM_003413.4	NM_003413.4	NM_003413.4:c.731G>A	p.Arg244Gln	Limited	VUS (3)	PM2, PP3
PED178	Solved (LP/P in OMIM gene)	AD de novo (no mosaicism detected)	ARCN1	Chr11:11:118454584 C>T	NM_001655.5	ENST00000264028.4	NM_001655.5:c.508C>T	p.Arg170*	Strong	Pathogenic (5)	PVS1, PS2, PM2
PED181	Candidate (VUS in OMIM gene)	AR compound heterozygous	IFT122	Chr3:129233227 G>A Chr3:129179506 C>G	NM_052989.3	ENST00000296266	NM_052989.3:c.2988-5G>A NM_052989.3:c.273-565C>G	p.? P.?	Strong	VUS (3) VUS (3)	PM2, PP3 PM2, PP3
PED183	Candidate (GUS)	AD de novo (no mosaicism detected)	PPARD	Chr6:35393723 A>G	NM_006238.5	NM_006238.5	NM_006238.5:c.1193A>G	p.Lys398Arg	N/A Novel gene
PED184	Candidate (GUS)	AR homozygous	ENO3	Chr17:4858392 G>A	NM_053013.4	NM_053013.4	NM_053013.4:c.467G>A	p.Gly156Asp	N/A Novel gene
PED187	Solved (LP/P in OMIM gene)	AD de novo (phased paternal, assay design failed)	TUBA1A	Chr12:49580233 G>A	NM_006009.4	NM_006009.4	NM_006009.4:c.235C>T	p.Arg79Cys	Strong	Likely Pathogenic (4)	PS2, PM2, PP2, PP3
PED189	Solved (LP/P in OMIM gene)	AD de novo (phased maternal, no mosaicism detected)	NIPBL	Chr5:37036589 G>A	NM_133433.4	NM_133433.4	NM_133433.4:c.5971G>A	p.Asp1991Asn	Definitive	Pathogenic (5)	PVS1_Strong, PS2, PM2
PED191	Candidate (GUS)	AD de novo (phased maternal, 0.05% mosaicism in blood)	PIK3C3	Chr18:39607432 C>T	NM_002647.4	NM_002647.4	NM_002647.4:c.1510C>T	p.Gln504*	N/A Novel gene
PED199	Solved (LP/P in OMIM gene)	AD de novo (no mosaicism detected)	PRKACB	Chr1:84649745 A>T	NM_182948.4	ENST00000370685.3	NM_182948.4:c.404A>T	p.His135Leu	Strong	Likely Pathogenic (4)	PS2, PM2, PP2, PP3
PED200	Solved (LP/P in novel phenotype)	XLR	ARSL	ChrX:2856206 C>A	NM_000047.3	ENST00000381134.3	NM_000047.3:c.1219G>T	p.Glu407*	Limited (expansion)	Likely Pathogenic (4)	PVS1, PM2
PED204	Candidate (GUS)	AD de novo (no mosaicism detected)	FLT1	Chr13:29012454 G>C	NM_002019.4	ENST00000282397.4	NM_002019.4:c.417C>G	p.Tyr139*	N/A Novel gene
PED205	Candidate (GUS)	AD de novo (no mosaicism detected)	RYR3	Chr15:34080617 A>G	NM_001036.6	ENST00000389232.4	NM_001036.5:c.9788A>G	p.Tyr3263Cys	N/A Novel gene
PED207	Solved (LP/P in OMIM gene)	AD de novo (no mosaicism detected)	KMT2D	Chr12:49435941 G>A	NM_003482.4	ENST00000301067.7	NM_003482.3:c.6040C>T	p.Gln2014*	Definitive	Pathogenic (5)	PVS1, PS2, PM2
PED214	Candidate (VUS in OMIM gene)	AR compound heterozygous	WDR81	Chr17:1629619 C>T Chr17:1634116 C>A	NM_001163809.2	ENST00000409644.1	NM_001163809.1:c.1366C>T NM_001163809.1:c.3843C>A	p.Arg456Trp p.Tyr1281*	Moderate	VUS (3) Likely Pathogenic (4)	PM2, PM3, PP3 PVS1, PM2
PED216	Candidate (VUS in OMIM gene)	AD de novo	PTCH1	Chr9:98209226 C>T	NM_000264.5	ENST00000331920.6	NM_000264.5:c.4312G>A	p.Glu1438Lys	Moderate	VUS (3)	PS2, PP3
PED217	Candidate (GUS)	AD de novo (no mosaicism detected)	GUCY1B1	Chr4:156724890 G>C	NM_000857.5	ENST00000264424.8	NM_000857.4:c.1528G>C	p.Val510Leu	N/A Novel gene
PED221	Candidate (GUS)	AR compound heterozygous	LATS2	Chr13:21562640 G>A Chr13:21557771 C>T	NM_014572.3	NM_014572.3	NM_014572.3:c.1279C>T NM_014572.3:c.2074G>A	p.Pro427Ser p.Ala692Thr	N/A Novel gene
PED225	Candidate (GUS)	AD de novo	ASAP2	Chr2:9533618 G>GGCCC	NM_003887.3	NM_003887.3	NM_003887.3:c.2526_2527insGCCC	p.Thr843AlafsTer?	N/A Novel gene
PED226	Solved (LP/P in OMIM gene)	AD de novo (no mosaicism detected)	FGFR2	Chr10:123279674 G>C	NM_000141.5	NM_000141.5	NM_000141.5:c.758C>G	p.Pro253Arg	Strong	Pathogenic (5)	PS1, PS2, PS3, PS4
PED231	Solved (LP/P in OMIM gene)	AR compound heterozygous	OSGEP	Chr14:20917124 G>A Chr14:20916116 C>T	NM_017807.4	NM_017807.4	NM_017807.4:c.556C>T NM_017807.4:c.740G>A	p.Arg186* p.Arg247Gln	Strong	Pathogenic (5) Pathogenic (5)	PVS1_strong, PS3,PM2, PM3 PS1, PS3, PS4, PM3
PED233	Solved (LP/P in OMIM gene)	AD inherited (M)	COL2A1	Chr12:48369120 CAG>C	NM_001844.5	NM_001844.5	NM_001844.5:c.3864_3865delCT	p.Cys1289Profs*3	Definitive	Likely Pathogenic (4)	PVS1_strong, PM2
PED234	Candidate (VUS in OMIM gene)	XLR	ATRX	ChrX:76938737 T>A	NM_000489.6	NM_000489.6	NM_000489.6:c.2011A>T	p.Asn671Tyr	Definitive	VUS (3)	PM2, PP3

## Sheet: Supplementary Table 4
Supplementary Table 4: Overview of functional follow-up studies to confirm pathogenic effect of candidate variants.
Novel genes
PED #	Gene (MIM)	Phenotype	Supporting evidence
7	MDFIC (614511) p.M131fs*/p.F244L	Non-immune hydrops fetalis (NIHF) Marked subcutaneous oedema, pericardial effusion, bilateral pleural effusion, ascites, pulmonary hypoplasia.	5 additional families with NIHF and biallelic variants in MDFIC identified. 3 families have the Met240fs*3 variant identified in this study in homozygosity. MDFIC knock-out mouse model has perinatal lethality with hydropic appearance (manuscript under review).
44	GNB2 (139390) p.K89E/wt de novo	Hypoplastic left heart and hypoplastic aortic arch, double outlet right ventricle, great arteries located side-by-side, ventricular septal defect, persistent left superior vena cava connecting to coronary sinus, renal agenesis, mildly dysmorphic facies.	11 additional patients with a syndromic neurodevelopmental disorder and de novo variants in GNB2 identified. 3 patients have variants at Lys89 [1].
Confirmation by RNA or in-vitro assays
PED #	Gene (MIM)	Phenotype	Supporting evidence
1	FGFR2 (176943) p.R255Q/R255Q	Ectrodactyly, Syndactyly, Oligodactyly, Bifid bones. Congenital cystic adenomatoid malformation of the lung, type 0. Pulmonary hypoplasia. Abnormal lung lobation. Abnormal facial shape. Echogenic fetal bowel.	Functional studies demonstrate FGFR2 variant to be a loss of function mutation, in contrast to gain-of-function mutations causative of AD Craniosynostosis phenotypes (e.g. MIM: 123500) [2].
2	DNAJB11 c.853-10G>A/c.853-10G>A	Fetal polycystic kidney displasia	RT-PCR and Nanopore sequencing on parental blood samples reveals retention of 8 intronic bases, leading to a frameshift and a premature stop codon. This variant remained a VUS as there is limited evidence that recessive DNAJB11 variants could lead to fetal polycystic kidney displasia. (PMID: 33129895, PMID: 34177435)
5	MKS1 (609883) c.1024+1G>T/c.1408-34_1408-6del	Encephalocele, Omphalocele, Cystic renal dysplasia,	RNA-seq of PED005 confirmed that MKS1 c.1408-34_1408-6del variant results in skipping of exon 16. The novel c.1024+1G>T variant revealed altered splicing downstream of exon 11, resulting in partial inclusion of intron 12 (Supplementary Figure 2).
12	B3GAT3 (606374) p.R169W/p.R225*	Pseudodiastrophic dysplasia (PDD) Short and bowed long bones with metaphyseal flaring, short ribs, platyspondyly, thoracic kyphosis, broad and flared ilia, multiple large joint subluxations, interphalangeal dislocation and deviation, talipes equinovarus, macrocephaly, dysmorphic facies.	Functional studies of the B3GAT3 variants confirmed the defect in proteoglycan biosynthesis leading to pseudodiastrophic dysplasia [3].
13	PIBF1 (607532) p.K353fs*/c.954G>A	Joubert syndrome 33 Cerebellar vermis hypoplasia, Increased nuchal translucency	RNA follow-up by RT-PCR and RNA sequencing (supplementary Figure 2) showed exon skipping of exon 8, as a result from the synonymous variant c.954G>A.
24	EIF2B2 (606454) p.R172*/c.284+5G>T	Pontocerebellar hypoplasia Marked microcephaly, posterior and temporal pachygria with simplified gyral pattern, underdeveloped frontal and temporo-parietal opercula with open sylvian fissure, hypoplasia of corpus callosum, subependymal cysts, contractures.	RNA sequencing of patient fibroblasts shows intron retention as a result from the c.284+5G>T variant and a reduction of expression down to 10% compared to controls (supplementary Figure 3). 1 additional patient with overlapping severe brain malformations and bi-allelic truncating variants in EIF2B2 identified. Leukoencephalopathy with vanishing white matter (MIM: 603896) is associated with bialle…
42	CANT1 (613165) p.E215K/E215K	Pseudodiastrophic dysplasia (PDD) Mesomelic/rhizomelic limb shortening, Skeletal dysplasia, Midface retrusion, Camptodactyly, Bell-shaped thorax, Equinovarus deformity	Functional studies of the CANT1 variant confirmed the defect in proteoglycan biosynthesis leading to pseudodiastrophic dysplasia[3].
104	MECOM (165215) c.2577+4A>T/wt.	Nonimmune hydrops fetalis, Preaxial polydactyly, Supernumerary ribs, Coronal cleft vertebrae	RNA follow-up by RT-PCR showed significantly increased skipping of exon 9 and 10 as a result from the c.2577+4A>T.

## Sheet: Supplementary Table 5
Pedigree ID	Gene Submitted	Inheritance	N Variants	Contribution to Proband	Method	Date Submitted	Date Responded	N Matches	N Institutions	Match Outcome	Comments
PED002	DNAJB11	AR	1	Novel Inheritance	GeneMatcher	2021-05-08	Awaiting response	1	1	Awaiting outcome report	2 recessive papers (PMID: 33129895, PMID: 34177435)
PED002	TMEM212	AR	1	Novel Disease Gene	GeneMatcher	2021-05-08	Awaiting response	2	2	Awaiting outcome report
PED024	EIF2B2	AR	2	Phenotype Expansion	seqr	28/08/2020	Awaiting response	4	2	Ongoing functional study
PED026	KIF26A	AR	2	Novel Disease Gene	seqr	22/01/2018	16/02/2020	36	21	Phenotype match
PED029	SIK3	AR	1	Novel Disease Gene	GeneMatcher	06/05/2019	23/09/2019	8	7	Partial phenotype match; Ongoing functional study
PED035	PLXNA3	XLR	1	Phenotype Expansion	seqr	25/05/2021	25/05/2021	139	47	Not a phenotype match; Commonly mutated gene
PED038	KDM5A	AD	1	Novel Disease Gene	seqr	10/01/2018	2018-12-01	18	14	Partial phenotype match; Different inheritance mode
PED040	LAMC3	AR	2	Phenotype Expansion	seqr	21/08/2019	Awaiting response	6	5	Publication (PMID: 33639934)
PED044	GNB2	AD	1	Novel Disease Gene	seqr	08/06/2018	2018-11-10	21	12	Publication (PMID: 34183358)
PED045	ZFHX3	AR	2	Novel Disease Gene	seqr	13/06/2018	25/05/2021	41	26	Phenotype match; Different inheritance mode
PED056	ARSL	XLR	1	Phenotype Expansion	GeneMatcher	2021-05-08	Awaiting response	1	1	Awaiting outcome report
PED060	FLII	AR	1	Novel Disease Gene	seqr	21/05/2019	25/05/2021	13	10	Not a phenotype match; Ongoing functional study
PED066	TBX3	AD	1	Phenotype Expansion	GeneMatcher	2021-05-08	Awaiting response	8	8	Awaiting outcome report
PED066	TBX5	AD	1	Phenotype Expansion	GeneMatcher	2021-05-08	Awaiting response	1	1	Awaiting outcome report
PED070	EGFL6	XLR	1	Novel Disease Gene	seqr	27/08/2020	31/08/2020	7	6	Not a phenotype match
PED071	AIFM1	XLR	1	Phenotype Expansion	seqr	18/05/2021	Awaiting response	15	13	Awaiting outcome report
PED073	KIAA0586	AR	2	Phenotype Expansion	GeneMatcher	05/08/2021	Awaiting response	2	2	Awaiting outcome report
PED075	HELZ2	AR	2	Novel Disease Gene	seqr	27/08/2019	13/02/2020	15	12	Phenotype match
PED077	TAF2	AR	2	Partial Overlap	seqr	12/09/2019	21/02/2020	12	4	Not a phenotype match
PED078	BCORL1	XLR	1	Phenotype Expansion	seqr	02/12/2019	21/01/2020	25	23	Partial phenotype match; Ongoing functional study
PED088	KDM2B	AR	2	Novel Disease Gene	seqr	02/12/2019	04/12/2019	42	19	Partial phenotype match; Different inheritance mode; Ongoing functional study
PED096	ADGRE3	AR	1	Novel Disease Gene	seqr	19/02/2020	20/02/2020	2	2	Partial phenotype match
PED102	ALAS2	XLR	1	Phenotype Expansion	GeneMatcher	2021-05-08	Awaiting response	4	4	Awaiting outcome report
PED102	SIN3A	AD	1	Phenotype Expansion	GeneMatcher	2021-05-08	Awaiting response	41	19	Awaiting outcome report
PED107	VARS1	AR	2	Phenotype Expansion	GeneMatcher	2021-05-08	Awaiting response	20	16	Awaiting outcome report
PED109	TOE1	AR	2	Partial Overlap	seqr	21/05/2020	21/05/2020	4	4	Partial phenotype match
PED110	HEATR5B	AR	1	Novel Disease Gene	GeneMatcher	2021-05-08	2021-05-08	14	6	Different inheritance mode
PED113	NUP85	AR	2	Partial Overlap	seqr	19/06/2020	19/06/2020	6	3	Publication (PMID: 34170319)
PED114	UNC13D	AR	2	Phenotype Expansion	GeneMatcher	2021-05-08	Awaiting response	5	5	Awaiting outcome report
PED115	SLC9A7	XLR	1	Novel Phenotype	seqr	09/03/2021	27/05/2021	17	15	Not a phenotype match
PED117	TRPC5	XLR	1	Novel Phenotype	seqr	31/01/2020	31/01/2020	33	10	Not a phenotype match	linked the neurological/epilepsy phenotype
PED118	TOR1AIP1	AR	1	Novel Phenotype	seqr	21/01/2020	22/01/2020	5	5	Not a phenotype match
PED122	SAMHD1	AD	1	Phenotype Expansion	GeneMatcher	2021-05-08	Awaiting response	4	4	Awaiting outcome report
PED128	PROX1	AD	1	Novel Disease Gene	seqr	26/05/2020	27/05/2020	6	5	Ongoing functional study
PED129	DNAH14	AR	2	Novel Disease Gene	seqr	13/08/2020	19/03/2021	27	19	Not a phenotype match
PED131	COG4	AR	1	Novel Phenotype	seqr	31/08/2020	01/09/2020	5	5	Not a phenotype match
PED132	RAPH1	AR	2	Novel Disease Gene	seqr	18/06/2020	18/06/2020	5	5	Not a phenotype match; Different inheritance mode
PED135	SIN3B	AD	1	Novel Disease Gene	seqr	03/07/2020	03/07/2020	14	8	Not a phenotype match	1 haploinsufficiency paper published linked to ID
PED144	CACNA1E	AD	1	Phenotype Expansion	GeneMatcher	2021-05-08	16/06/2021	38	29	Not a phenotype match
PED145	MMP9	AR	1	Partial Overlap	GeneMatcher	17/03/2021	Awaiting response	4	4	Awaiting outcome report
PED154	DHX37	AR	2	Phenotype Expansion	GeneMatcher	2021-05-08	Awaiting response	18	13	Not a phenotype match
PED162	EWSR1	AD	1	Novel Phenotype	GeneMatcher	11/03/2021	Awaiting response	5	3	Awaiting outcome report
PED167	CREB3L2	AR	1	Novel Disease Gene	GeneMatcher	10/12/2020	03/06/2021	3	3	Partial phenotype match; Ongoing functional study
PED177	ZIC3	XLR	1	Phenotype Expansion	GeneMatcher	2021-05-08	Awaiting response	9	9	Awaiting outcome report
PED183	PPARD	AD	1	Novel Disease Gene	GeneMatcher	11/03/2021	Awaiting response	8	8	Awaiting outcome report
PED184	ENO3	AR	1	Novel Disease Gene	GeneMatcher	07/05/2021	Awaiting response	3	1	Awaiting outcome report
PED191	PIK3C3	AD	1	Novel Disease Gene	GeneMatcher	09/03/2021	16/03/2021	17	12	Not a phenotype match
PED200	ARSL	XLR	1	Phenotype Expansion	GeneMatcher	2021-05-08	Awaiting response	1	1	Awaiting outcome report
PED204	FLT1	AD	1	Novel Disease Gene	GeneMatcher	25/03/2021	25/03/2021	15	11	Not a phenotype match; Ongoing functional study
PED205	RYR3	AD	1	Novel Disease Gene	GeneMatcher	25/03/2021	2021-08-12	114	44	Not a phenotype match; Commonly mutated gene
PED206	MACF1	AD	1	Phenotype Expansion	GeneMatcher	16/07/2021	Awaiting response	106	53	Commonly mutated gene
PED217	GUCY1B1	AD	1	Novel Disease Gene	GeneMatcher	2021-05-08	2021-06-08	5	4	Not a phenotype match; Different inheritance mode
PED225	ASAP2	AD	1	Novel Disease Gene	GeneMatcher	2021-05-08	Awaiting response	4	4	Awaiting outcome report
50 families	52 genes	26 AR, 10 XLR & 17 AD	68 variants		26 seqr; 28 GeneMatcher		30 Response received; 23 Awaiting response

## Sheet: Supplementary Table 6
Genomic Autopsy Study pedigree ID	Family structure tested	Sex of proband	Gestation at delivery (weeks)	Classification	Reason for referral	Diagnostic Status	Gene ID	variant	Inheritance	Disease gene validity Panelapp Australia, Clingen and literature	Gene constraint loeuf	Gene constraint missense o/e	homozygous LoF gnomad	Mouse MGI phenotype
PED002	Trio	Female	24	Termination	Single congenital anomaly	Strong candidate (VUS in novel gene) Strong candidate (VUS in novel phenotype)	TMEM212 DNAJB11	p.G111R/p.G111R c.853-10G>A/c.853-10G>A	homozygous homozygous	None Limited for AR Polycystic Kidney Disease, but Strong for AD PKD	1.16 (pLI = 0) 0.25 (pLI = 0.23)	0.7 (Z = 1.04) 0.64 (Z = 1.77)	0 0	N/A DNAJB11 preweaning lethality (Hom)
PED003	Quad	Male	-1	Neonatal death	Unexplained neonatal death	Strong candidate (VUS in novel phenotype)	UBR4	p.V789E/V789E	homozygous	None for Neonatal death & Limited for Neurodevelopmental disorders	0.06 (pLI = 1)	0.7 (Z = 5.68)	0 (2 likely not LoF different transcript)	embryonic lethality during organogenesis (Hom)
PED026	Trio	Male	21	Termination	Multiple congenital anomalies	Strong candidate (VUS in novel gene)	KIF26A	p.A1559V/p.R721C	comp het	None	0.31 (pLI = 0)	0.99 (Z = 0.09)	0	Postnatal lethality (Hom)
PED029	Quad	Male	19	Termination	Multiple congenital anomalies	Strong candidate (VUS in OMIM gene)	SIK3	p.R393H/p.R393H	homozygous	Limited for Skeletal disorders	0.05 (pLI = 1)	0.71 (Z = 2.83)	0	Neonatal lethality (Hom), skeletal dysplasia (PMID: 30232230)
PED030	Trio	Male	N/A	N/A	Multiple congenital anomalies	Strong candidate (VUS in novel inheritance and phenotype) Strong candidate (VUS in novel inheritance and phenotype)	FLNA FLNC	p.G1706S XL p.A2357V/wt	XLR (digenic) de novo (digenic)	Strong for Neurodevelopmental and Skeletal disorders	0.03 (pLI = 1) 0.17 (pLI = 1)	0.70 (Z= 3.78) 0.81 (Z = 2.79)	1 tagged 'Not LoF' 0	lethality throughout fetal growth and development (Hemi - FLNA) preweaning lethality (Hom - FLNC)
PED035	Trio	Male	20	Termination	Single congenital anomaly, genetic cause suspected	Strong candidate (VUS in novel gene)	PLXNA3	p.R184H	hemizygous (XLR)	Strong for sex development, none for Neurological	0.25 (PLI = 0.05)	0.94 (Z = 0.68)	12 hemizygous	nervous system abnormatities (hemi)
PED038	Trio	Male	17	Termination	Multiple congenital anomalies	Strong candidate (VUS in novel gene)	KDM5A	p.G8S/wt	de novo	None	0.09 (pLI =1)	0.79 (Z = 2.25)	0	Neonatal lethality (Hom)
PED040	Trio	Male	21+5	Termination	Single congenital anomaly	Strong candidate (VUS in novel phenotype)	LAMC3	p.R356C/p.Q909R	comp het	Disputed for AD Neurodevelopmental disorders	0.66 (pLI = 0)	1.04 (Z = -0.43)	0	Nervous system abnormalities
PED045	Trio	Male	26	Stillbirth	Multiple congenital anomalies	Strong candidate (VUS in novel phenotype)	ZFHX3	p.S3625L/Q3204del	Compound heterozygous	Limited for ID, none for Tracheoesophageal fistula & Laryneal/Esophageal atresia	0.02 (pLI = 1)	0.57 (Z = 3.94)	0	Prenatal lethality (Hom) Postnatal lethality (Het)
PED049	Trio	Male			Unexplained fetal death	Strong candidate (VUS in OMIM gene)	KCNJ2	p.Leu382Arg/wt	inherited maternal (AD)	Moderate for Short QT syndrome, Limited for Long QT syndrome	0.24 (PLI = 0.31)	0.5 (Z = 2.75)	0	Neonatal lethality, compete penetrance (Hom)
PED051	Quad	Male	22+5	Termination	Multiple congenital anomalies	Strong candidate (VUS in OMIM gene)	ZFPM2	duplication (22kb)	inherited maternal (AD)	Strong for Diaphragmatic hernia				Perinatal lethality (Het)
PED060	Trio	Female	27	Termination	Multiple congenital anomalies	Strong candidate (VUS in novel gene)	FLII	p.F1143Y/p.F1143Y	homozygous	Strong for cardiovascular disorders, none for Lymphatic disorders	0.45 (pLI = 0)	0.95 (Z = 0.51)	0	embryonic lethality at implantation
PED066	Trio	Female	34	Stillbirth	Single congenital anomaly	Strong candidate (VUS in novel phenotype)	TBX5 & TBX3	duplication CNV	De novo??	Strong for cardiovascular defects, none for Respiratory disorders				embryonic lethality during organogenesis (Hom)
PED071	Trio	Male	22	Termination	Multiple congenital anomalies	Strong candidate (VUS in OMIM gene)	AIFM1	p.R3Q	hemizygous (XLR)	Limited for Neurodevelopmental, strong for Neuromyopathy	0.07 (pLI = 1)	0.55 (Z = 0.55)	0	embryonic lethality during organogenesis (Hemi)
PED073	Trio	Female	17	Termination	Multiple congenital anomalies	Strong candidate (VUS in OMIM gene)	KIAA0586	p.N441S/p.A576V	comp het	Limited for Neurodevelopmental	0.54 (pLI = 0)	0.96 (Z = 0.37)	2 Clinvar (P/LP)	embryonic lethality during organogenesis (Hom)
PED075	Trio	Male	16	Termination	Single congenital anomaly	Strong candidate (VUS in novel gene)	HELZ2	p.L720V/p.A915T	comp het	None	0.35 (pLI = 0)	0.97 (Z = 0.43)	1	Growth/metabolism/liver abnormalities
PED077	Trio	Female	22+4	Termination	Multiple congenital anomalies	Strong candidate (VUS in OMIM gene)	TAF2	p.C192F/p.P844L	comp het	Strong for Neurological disorders, none for Cardiovascular	0.28 (pLI = 0)	0.69 (Z = 2.78)	0	Preweaning lethality (Hom)
PED078	Quad	Male	22+5	Termination	Multiple congenital anomalies, genetic cause suspected	Strong candidate (VUS in novel phenotype)	BCORL1	p.Y1692*	XLR	N/A novel phenotype	0.05 (pLI = 1)	0.79 Z = 2.06)	9 hemizygous	Reduced fertitlity (Hemi)
PED088	Trio	Male	21+1	Termination	Multiple congenital anomalies	Strong candidate (VUS in novel gene)	KDM2B	p.E928V/p.R888P	comp het	None	0.09 (pLI = 1)	0.67 (Z = 3.44)	4 dubious quality	embryonic lethality during organogenesis (Hom)
PED096	Trio	Female	20+5	Termination	Multiple congenital anomalies	Strong candidate (VUS in novel gene)	EMR3	c.355+2T>G/c.355+2T>G	homozygous	None	1.13 (pLI = 0)	0.89 (Z = 0.71)	1 dubious quality	No mouse KO studied
PED102	Trio	Female	36	Neonatal death	Unexplained neonatal death	Strong candidate (VUS in OMIM gene) Strong candidate (VUS in OMIM gene)	SIN3A ALAS2	p.Q361fs*/wt p.C11G/wt	de novo de novo	Strong for neurological disorders, none for respiratory Strong for haematological disorders, none for respiratory	0.01 (pLI = 1) 0 (pLI = 1)	0.54 (Z = 4.39) 0.56 (Z = 2.37)	0 0	Embryonic lethality between implantation and placentation (Hom) Embryonic lethality during organogenesis (Hemi)
PED107	Quad	Male	36+1	Neonatal death	Multiple congenital anomalies	Strong candidate (VUS in OMIM gene)	VARS	p.T1068M/p.P344H	comp het	Strong for Neurological & Seizures	0.37 (pLI = 0)	0.73 (Z = 2.68)	0	No mouse KO phenotype listed
PED109	Trio	Male	20+6	Termination	Multiple congenital anomalies	Strong candidate (VUS in novel phenotype)	TOE1	p.A54V/p.H319Y	Partial	Strong for Ambiguous Genitalia, but None for Heart Morphology	1.03 (pLI = 0)	0.83 (Z = 1.07)	0	embryonic lethality during organogenesis (Hom)
PED110	Trio	Male	23+4	Stillbirth	Multiple congenital anomalies, genetic cause suspected	Strong candidate (VUS in novel gene)	HEATR5B	p.Ala1344fs/p.Ala1344fs	homozygous	N/A Novel gene	0.5 (PLI = 0)	0.82 (Z = 2.14)	0	No mouse KO phenotype listed
PED113	Trio	Female	27+0	Termination	Single congenital anomaly	Strong candidate (VUS in novel phenotype)	NUP85	p.M530T/p.N370S	comp het	Strong for renal disorders, none for neurological disorders	0.05 (pLI = 1)	0.89 (Z = 0.76)	774 dubious quality/ transcript UTR	Preweaning lethality (Hom)
PED114	Trio	Female	17	Termination	Multiple congenital anomalies	Strong candidate (VUS in novel phenotype)	UNC13D	p.V300M/p.M795T	comp het	Strong for immune disorders, none for muscular disorders	0.59 (pLI = 0)	1.03 (Z = -0.24)	2 dubious quality	Hemtopoietic and immune system abnormalities (Hom)
PED115	Trio	Male	22	Stillbirth	Multiple congenital anomalies	Strong candidate (VUS in novel phenotype)	SLC9A7	c.1030-1G>C	hemizygous (XLR)	Limited for glycolysation disorders	0.08 (pLI = 0.99)	0.64 (Z = 2.12)	0	No mouse KO phenotype listed
PED117	Trio	Male	22	Termination	Single congenital anomaly, genetic cause suspected	Strong candidate (VUS in novel gene)	TRPC5	p.P398T	hemizygous (XLR)	None	0.04 (pLI = 1)	0.52 (Z = 3.27)	1 hemizygote	Neurological abnormatities (hemi)
PED118	Trio	Male	15	Miscarriage	Unexplained fetal death	Strong candidate (VUS in OMIM gene)	TOR1AIP1	p.Q226*(dn)/p.D160H (mat)	comp het	Strong for arthrogryposis and muscular dystrophy	0.62 (pLI = 0)	1.14 (Z = -0.88)	42 last exon + dubious (59382)	perinatal lethality (Hom)
PED122	Trio	Male	18+2	Termination	Multiple congenital anomalies	Strong candidate (VUS in OMIM gene)	TTN	p.R20245* (dn)/p.V2373F (mat)	comp het/ de novo	Strong for cardiomyopathy	0.33 (pLI = 0)	1.02 (Z = -1.1)	6 (VUS and conflicting in clinvar)	embryonic lethality during organogenesis (Het)
PED128	Trio	Female	22	Termination	Single congenital anomaly	Strong candidate (VUS in novel gene)	PROX1	p.N131S/wt	de novo	None	0.07 (pLI = 1)	0.53 (Z = 3.52)	0	Postnatal lethality (Het)
PED129	Trio	Female	22	Termination	Multiple congenital anomalies	Strong candidate (VUS in novel gene)	DNAH14	p.K2672E/p.R4211Q	comp het	None	1.07 (pLI = 0)	0.8 (Z = 1.02)	Low complexity regions	No mouse KO phenotype listed
PED131	Quad	Male	15	Termination	Multiple congenital anomalies	Strong candidate (VUS in novel phenotype)	COG4	p.R468Q/p.R468Q	homozygous	Strong for skeletal dysplasia	0.49 (pLI = 0)	1.04 (Z = -028)	0	Embryonic lethality prior to organogenesis (Hom)
PED132	Trio	Female	13 +2	Termination	Multiple congenital anomalies	Strong candidate (VUS in novel gene)	RAPH1	p.P611L/c.1512+2C>T	comp het	None	0.11 (pLI = 1)	0.85 (Z = 1.39)	0	Postnatal lethality (Hom)
PED135	Trio	Male	26	Stillbirth	Unexplained fetal death	Strong candidate (VUS in novel gene)	SIN3B	p.R919W/wt	de novo	Strong for intellectual disability, None for XXX	0.09 (pLI = 1)	0.6 (Z = 3.87)	1 (+4 dubious quality/transcript)	Abnormal channel response (Hom)
PED144	Trio	Male	20+4	Stillbirth	Multiple congenital anomalies	Strong candidate (VUS in novel phenotype)	CACNA1E	p.D293H/wt	de novo	Strong for muscular and intellectual disability	0.07 (pLI = 1)	0.56 (Z = 5.81)	0	Neonatal lethality (Hom)
PED145	Trio	Male	28	Stillbirth	Multiple congenital anomalies	Strong candidate (VUS in OMIM gene)	MMP9	p.V610M/p.V610M	homozygous	Strong for skeletal dysplasia	0.88 (pLI = 0)	0.94 (Z = 0.41)	2 (Clinvar conflicting)	Skeletal abnormalities (Hom)
PED154	Trio	Male	24	Termination	Multiple congenital anomalies	Strong candidate (VUS in OMIM gene)	DHX37	p.E172_L173_insSE/p.R889Q	comp het	Strong ID and sex development	0.17 (pLI = 0.99)	0.81 (Z = 1.83)	373 dubious quality/transcript	Preweaning lethality (Hom)
PED162	Trio	Female	33	Termination	Single congenital anomaly	Strong candidate (VUS in novel gene)	EWSR1	p.L169Q/wt	de novo	None	0.1 (pLI = 1)	0.64 (Z = 2.52)	0	Preweaning lethality (Hom)
PED167	Trio	Female	25+3	Termination	Single congenital anomaly	Strong candidate (VUS in novel gene)	CREB3L2	p.Q186*/p.Q186*	homozygous	None	0.38 (pLI = 0)	0.99 (Z = 0.03)	2 dubious quality	Neonatal lethality (Hom)
PED173	Trio	Male	20	Termination	Single congenital anomaly	Strong candidate (VUS in OMIM gene)	TP63	p.I225T/wt	de novo	Strong for clefting disorders	0.13 (pLI = 1)	0.7 (Z = 2.21)	0	Premature death, neonatal lethality (Het)
PED177	Trio	Male	26+1	Neonatal death	Multiple congenital anomalies	Strong candidate (VUS in OMIM gene)	ZIC3	p.R244Q	XLR	Strong for heterotaxy, none for respiratory	0 (pLI = 0.92)	0.49 (Z = 2.52)	2 hemi, 1 in Mane transcript)	Embryonic lethality (Hemi)
PED181	Trio	Female	17	Termination	Multiple congenital anomalies, genetic cause suspected	Strong candidate (VUS in OMIM gene)	IFT122	c.3141-5G>A/c.273-191C>G	comp het	Strong	0.68 (PLI = 0)	0.96 (Z = 0.35)	1 (tagged 'Not LoF')	Embryonic lethality during organogenesis (Hom)
PED183	Trio	Male	13	Termination	Multiple congenital anomalies	Strong candidate (VUS in novel gene)	PPARD	p.K398R/wt	de novo	None	0 (pLI = 0.99)	0.58 (Z = 2.48)	0	Embryonic lethality during organogenesis (Hom)
PED184	Trio	Male	22	Termination	Multiple congenital anomalies	Strong candidate (VUS in novel gene)	ENO3	p.G156D/p.G156D	homozygous	Strong for metabolic disorders, none for urogenital	1.22 (pLI = 0)	1.16 (Z = -0.93)	0	No mouse KO phenotype
PED191	Trio	Female	27	Stillbirth	Unexplained fetal death	Strong candidate (VUS in novel gene)	PIK3C3	p.Q504*/wt	de novo	None	0.48 (pLI = 0)	0.68 (Z = 2.44)	0	Embryonic lethality between implantation and placentation (Hom)
PED204	Trio	Male	21	Termination	Single congenital anomaly	Strong candidate (VUS in novel gene)	FLT1	p.Y139*/wt	de novo	None	0.15 (pLI = 1)	0.85 (Z = 1.45)	0	Embryonic lethality during organogenesis (Hom)
PED205	Trio	Male	15+4	Termination	Multiple congenital anomalies	Strong candidate (VUS in novel gene)	RYR3	p.Y3263C/wt	de novo	Limited for myopathy, none for lymphatic disorders	0.22 (pLI = 0.71)	0.9 (Z = 1.84)	0	Abnormal muscle contractility (Hom)
PED214	Trio	Male	32+5	Termination	Single congenital anomaly, genetic cause suspected	Strong candidate (VUS in OMIM gene)	WDR81	p.R456W/p.Y1281*	comp het	Moderate	0.38 (pLI = 0)	0.83 (Z = 2.11)	0	Preweaning lethality (Hom)
PED216	Trio	Female	22	Termination	Single congenital anomaly, genetic cause suspected	Strong candidate (VUS in OMIM gene)	PTCH1	p.E1438K/wt	de novo	Moderate	0.02 (pLI = 1)	0.84 (Z = 1.68)	0	Premature death (Het)
PED217	Trio	Female	23	Termination	Multiple congenital anomalies, genetic cause suspected	Strong candidate (VUS in novel gene)	GUCY1B1	p.V510L/wt	de novo	None	0.42 (pLI = 0)	0.52 (Z = 3.12)	1 (tagged 'Not LoF')	Premature death (Hom)
PED221	Trio	Female	36	Neonatal death	Unexplained neonatal death	Strong candidate (VUS in novel gene)	LATS2	p.P427S/p.A692T	comp het	None	0.14 (pLI = 1)	0.76 (Z = 2.21)	0	Embryonic lethality during organogenesis (Hom)
PED225	Trio	Female	38	Neonatal death	Multiple congenital anomalies, genetic cause suspected	Strong candidate (VUS in novel gene)	ASAP2	p.T843Afs*/wt	de novo	None	0.12 (pLI = 1)	0.73 (Z = 2.37)	0	No mouse KO phenotype
PED234	Trio	Male	34+4	Stillbirth	Single congenital anomaly, genetic cause suspected	Strong candidate (VUS in OMIM gene)	ATRX	p.N671Y	XLR	Definitive	0.06 (pLI = 1)	0.7 (Z = 3.1)	1 (Low Confidence pLoF)	Embryonic lethality during organogenesis (Hemi)

## Sheet: Supplementary Table 7
Genomic Autopsy Study pedigree ID	Family structure tested	Sex of proband	Gestation at delivery (weeks)	Classification	Mother sample source (DNA)	Father sample source (DNA)	Proband (DNA) sample source	Sibling 1 sample source (DNA)
PED001	Trio	Female	36	Neonatal death	Whole blood	Whole blood	Whole blood
PED002	Trio	Female	24	Termination	Whole blood (RNA)	Whole blood (RNA)	Kidney
PED003	Quad	Male	-1	Neonatal death	Whole blood	Whole blood	Whole blood	Unknown
PED004	Quad	Male	20	Termination	Whole blood	Whole blood	Whole blood	Whole blood
PED005	Trio	Male	13	Termination	Whole blood	Whole blood	Lung Skin fibroblasts (RNA)
PED006	Quad	Male	17	Termination	Whole blood	Whole blood	Lung	Whole blood
PED007	Trio	Male	26	Neonatal death	Whole blood	Whole blood	Whole blood Skin fibroblasts (RNA)
PED008	Trio	Female	39	Stillbirth	Whole blood	Whole blood	Lung
PED010	Trio	Female	20	Termination	Not specified	Not specified	Fetal Tissue (not specified)
PED011	Trio	Male	17	Termination	Whole blood	Whole blood	Lung
PED012	Quad	Male	16	Miscarriage	Whole blood	Whole blood	Chorionic villus	Whole blood
PED013	Trio	Female	22	Termination	Whole blood	Whole blood	Amnio Lung (RNA)
PED014	Trio	Female	16	Termination	Whole blood	Whole blood	Skin fibroblasts
PED015	Trio	Male	-1	Termination	Whole blood	Whole blood	Lung
PED016	Trio	Female	39+4	Stillbirth	Whole blood	Whole blood	Fetal Tissue (not specified)
PED017	Trio	Female	40	Neonatal death	Whole blood	Whole blood	Lung
PED018	Trio	Female	20	Termination	Whole blood	Whole blood	Whole blood
PED019	Trio	Female	18+3	Termination	Whole blood	Whole blood	Chorionic villus
PED020	Quad	Male	21	Termination	Whole blood	Whole blood	Fetal Tissue (not specified)	Whole blood
PED021	Trio	Male	22	Termination	Whole blood	Whole blood	Whole blood
PED022	Trio	Female	22	Termination	Whole blood	Whole blood	Whole blood
PED023	Trio	Female	22	Termination	Whole blood	Whole blood	Lung
PED024	Quad	Male	35	Neonatal death	Whole blood	Whole blood	Cord blood Skin fibroblasts (RNA)	Cord blood
PED025	Trio	Male	21	Termination	Whole blood	Whole blood	Skin fibroblasts
PED026	Trio	Male	21	Termination	Whole blood	Whole blood	Lung
PED027	Trio	Male	35	Stillbirth	Whole blood	Whole blood	Lung
PED028	Trio	Female	21+3	Termination	Whole blood	Whole blood	Lung
PED029	Quad	Male	19	Termination	Whole blood	Whole blood	Chorionic villus	Fetal Tissue (not specified)
PED030	Trio	Male			Whole blood	Whole blood	Whole blood
PED031	Trio	Female	19	Termination	Whole blood	Whole blood	Ovary
PED032	Trio	Female	38	Stillbirth	Not specified	Not specified	Fetal Tissue (not specified)
PED033	Trio	Male	17	Miscarriage	Whole blood	Whole blood	Lung
PED034	Trio	Male	18	Termination	Whole blood	Whole blood	Fetal Tissue (not specified)
PED035	Trio	Male	20	Termination	Not specified	Not specified	Whole blood
PED036	Trio	Female	36	Stillbirth	Whole blood	Whole blood	Skin
PED037	Trio	Male	21	Termination	Whole blood	Whole blood	Fetal Tissue (not specified)
PED038	Trio	Male	17	Termination	Whole blood	Whole blood	Lung
PED039	Trio	Female	28	Termination	Whole blood	Whole blood	Lung
PED040	Trio	Male	21+5	Termination	Whole blood	Whole blood	Lung
PED041	Trio	Female	16	Miscarriage	Whole blood	Whole blood	Lung	Other
PED042	Trio	Male	18	Termination	Whole blood	Whole blood	Whole blood
PED043	Trio	Female	38	Neonatal death	Whole blood	Whole blood Sperm	Whole blood
PED044	Trio	Female	20	Termination	Whole blood	Whole blood	Lung
PED045	Trio	Male	26	Stillbirth	Whole blood	Whole blood	Whole blood
PED046	Trio	Female	21	Termination	Whole blood	Whole blood	Gonad
PED047	Quad	Female	33	Stillbirth	Whole blood	Whole blood	Whole blood	Lung
PED049	Trio	Male	34	Stillbirth	Whole blood	Whole blood	Lung
PED051	Quad	Male	22+5	Termination	Whole blood	Whole blood	Lung	Placenta
PED052	Trio	Male	22+3	Termination	Whole blood	Whole blood	Whole blood
PED053	Trio	Female	22	Termination	Whole blood	Whole blood	Whole blood
PED054	Trio	Female	20+1	Termination	Whole blood	Whole blood	Whole blood
PED055	Trio	Male	17+5	Termination	Whole blood	Whole blood	Lung
PED056	Quad	Male	17	Miscarriage	Whole blood	Whole blood	Lung	Lung
PED057	Trio	Female	27+2	Termination	Saliva	Saliva	Fetal Tissue (not specified)
PED058	Trio	Male	22	Termination	Whole blood	Whole blood	Whole blood	Whole blood
PED060	Trio	Female	27	Termination	Whole blood	Whole blood	Fetal Tissue (not specified)
PED061	Trio	Male	18	Termination	Whole blood	Whole blood	Lung
PED063	Trio	Female	25	Termination	Whole blood	Whole blood	Amnio
PED065	Quad	Male	21	Termination	Saliva	Saliva	Amnio	Whole blood
PED066	Trio	Female	34	Stillbirth	Saliva	Saliva	Liver
PED068	Trio	Female	38+5	Stillbirth	Saliva	Saliva	Liver
PED069	Trio	Male	21+6	Termination	Saliva	Saliva	Umbilical cord
PED070	Trio	Male	33	Neonatal death	Whole blood	Whole blood	Whole blood
PED071	Trio	Male	22	Termination	Whole blood	Whole blood	Lung
PED072	Trio	Male	38	Neonatal death	Whole blood	Whole blood	Lung
PED073	Trio	Female	17	Termination	Whole blood	Whole blood	Liver
PED074	Trio	Female	22+5	Termination	Whole blood	Whole blood	Amnio
PED075	Trio	Male	16	Termination	Whole blood	Whole blood	Fetal Tissue (not specified)
PED076	Trio	Male	24	Termination	Whole blood	Whole blood	Liver
PED077	Trio	Female	22+4	Termination	Saliva	Saliva	Muscle
PED078	Quad	Male	22+5	Termination	Saliva	Saliva	Umbilical cord	Umbilical cord
PED081	Trio	Male	33	Stillbirth	Whole blood	Whole blood	Lung
PED082	Trio	Female	22+6	Termination	Whole blood	Whole blood	Lung
PED083	Trio	Female	21+2	Stillbirth	Saliva	Saliva	Fetal Tissue (not specified)
PED084	Trio	Female	22	Termination	Not specified	Whole blood Sperm	Lung
PED085	Trio	Female	18+4	Termination	Saliva	Saliva	Muscle
PED086	Trio	Female	20+1	Termination	Saliva	Saliva	Muscle
PED087	Trio	Male	27	Stillbirth	Saliva	Saliva	Liver
PED088	Trio	Male	21+1	Termination	Whole blood	Whole blood	Liver
PED089	Trio	Female	23	Stillbirth	Whole blood	Whole blood	Lung	Other
PED091	Trio	Male	30+0	Neonatal death	Saliva	Saliva	Whole blood
PED093	Trio	Female	32+5	Neonatal death	Saliva	Saliva	Fetal Tissue (not specified)
PED095	Trio	Male	13	Termination	Whole blood	Whole blood Sperm	Fetal Tissue (not specified)
PED096	Trio	Female	20+5	Termination	Whole blood	Whole blood	Lung
PED097	Trio	Female	16	Termination	Saliva	Saliva	Whole blood
PED098	Trio	Male	20+5	Termination	Saliva	Saliva	Amnio
PED100	Quad	Male	19+5	Termination	Not specified	Not specified	Muscle Placenta	Fetal Tissue (not specified)
PED102	Trio	Female	36	Neonatal death	Whole blood	Whole blood	Whole blood
PED103	Trio	Female	21	Termination	Whole blood	Whole blood	Lung
PED104	Trio	Female	20+2	Stillbirth	Saliva Blood (RNA)	Saliva	Umbilical cord
PED107	Quad	Male	36+1	Neonatal death	Whole blood	Whole blood	Skin	Whole blood
PED108	Trio	Male	22+1	Termination	Not specified	Whole blood	Fetal Tissue (not specified)
PED109	Trio	Male	20+6	Termination	Whole blood	Whole blood	Liver
PED110	Trio	Male	23+4	Stillbirth	Saliva	Saliva	Umbilical cord
PED111	Trio	Female	25+5	Termination	Not specified	Not specified	Fetal Tissue (not specified)
PED112	Trio	Male	20+2	Termination	Not specified	Not specified	Amnio
PED113	Trio	Female	27+0	Termination	Saliva	Saliva	Cerebellum
PED114	Trio	Female	17	Termination	Saliva	Saliva	Skin
PED115	Trio	Male	22	Stillbirth	Saliva	Saliva	Amnio
PED116	Trio	Female	30+2	Neonatal death	Saliva	Saliva	Fetal Tissue (not specified)
PED117	Trio	Male	22	Termination	Whole blood	Whole blood	Lung
PED118	Trio	Male	15	Miscarriage	Whole blood	Whole blood Sperm	Placenta
PED119	Trio	Male	24+5	Termination	Whole blood	Whole blood	Fetal Tissue (not specified)
PED120	Trio	Female	22	Termination	Whole blood	Whole blood	Lung
PED121	Trio	Female	28+6	Neonatal death	Saliva	Saliva	Fetal Tissue (not specified)
PED122	Trio	Male	18+2	Termination	Whole blood	Whole blood	Fetal Tissue (not specified)
PED123	Trio	Female	22	Stillbirth	Whole blood	Whole blood	Muscle
PED124	Trio	Male	23	Termination	Whole blood	Whole blood	Fetal Tissue (not specified)
PED127	Trio	Male	26	Stillbirth	Whole blood	Whole blood	Lung
PED128	Trio	Female	22	Termination	Whole blood	Whole blood Sperm	Skin
PED129	Trio	Female	22	Termination	Whole blood	Whole blood	Lung
PED131	Quad	Male	15	Termination	Whole blood	Whole blood	Muscle	Chorionic villus
PED132	Trio	Female	13 +2	Termination	Whole blood	Whole blood	Chorionic villus
PED133	Trio	Male	19+5	Termination	Not specified	Not specified	Fetal Tissue (not specified)
PED134	Trio	Female	30+5	Termination	Whole blood	Whole blood	Skin
PED135	Trio	Male	26	Stillbirth	Whole blood	Whole blood	Lung
PED136	Quad	Female	22+3	Termination	Saliva	Saliva	Fetal Tissue (not specified)	Whole blood
PED138	Trio	Male	24+5	Termination	Whole blood	Whole blood	Skin
PED139	Quad	Male	25	Stillbirth	Whole blood	Whole blood	Fetal Tissue (not specified)	Fetal Tissue (not specified)
PED140	Trio	Male	20+3	Termination	Whole blood	Whole blood	Fetal Tissue (not specified)
PED141	Trio	Female	39	Stillbirth	Whole blood	Whole blood	Lung
PED143	Trio	Female	16+2	Termination	Whole blood	Whole blood	Amnio
PED144	Trio	Male	20+4	Stillbirth	Saliva	Saliva	Fetal Tissue (not specified)
PED145	Trio	Male	28/40	Stillbirth	Whole blood	Whole blood	Lung
PED146	Trio	Male	18+3	Termination	Saliva	Saliva	Whole blood
PED148	Quad	Male	17+3	Termination	Saliva	Saliva	Liver	Guthrie card
PED150	Trio	Male	29	Stillbirth	Whole blood	Whole blood	Fetal Tissue (not specified)
PED151	Trio	Male	15	Termination	Whole blood	Whole blood	Lung
PED152	Trio	Female	38+1	Neonatal death	Whole blood	Whole blood	Whole blood
PED153	Trio	Male	23	Termination	Whole blood	Whole blood	Lung
PED154	Trio	Male	24	Termination	Saliva	Saliva	Fetal Tissue (not specified)
PED156	Trio	Female	20+2	Termination	Saliva	Saliva	Fetal Tissue (not specified)
PED157	Trio	Female	24+6	Termination	Whole blood	Whole blood	Umbilical cord
PED158	Trio	Female	34	Stillbirth	Whole blood	Whole blood	Fetal Tissue (not specified)
PED159	Trio	Female	27	Termination	Saliva	Saliva	Chorionic villus
PED160	Trio	Male	34	Stillbirth	Whole blood	Whole blood	Skin fibroblasts
PED161	Quad	Female	18+6	Termination	Saliva	Saliva	Fetal Tissue (not specified)	Amnio
PED162	Trio	Female	33	Termination	Whole blood	Whole blood	Skin fibroblasts
PED164	Trio	Male	22	Termination	Saliva	Saliva	Fetal Tissue (not specified)
PED165	Trio	Female	27	Stillbirth	Saliva	Saliva	Fetal Tissue (not specified)
PED167	Trio	Female	25+3	Termination	Whole blood	Whole blood	Fetal Tissue (not specified)
PED168	Trio	Female	22+6	Termination	Whole blood	Whole blood	Muscle
PED169	Trio	Male	24	Termination	Saliva	Saliva	Fetal Tissue (not specified)
PED170	Trio	Female	21	Termination	Saliva	Saliva	Liver
PED171	Trio	Male	21+0	Termination	Whole blood	Whole blood	Fetal Tissue (not specified)
PED172	Trio	Male	21	Termination	Whole blood	Whole blood	Fetal Tissue (not specified)
PED173	Trio	Male	20	Termination	Whole blood	Whole blood	Fetal Tissue (not specified)
PED174	Trio	Female	37+6	Neonatal death	Saliva	Saliva	Fetal Tissue (not specified)
PED175	Trio	Male	14	Miscarriage	Saliva	Saliva	Fetal Tissue (not specified)
PED176	Trio	Female	20	Termination	Whole blood	Whole blood	Skin
PED177	Trio	Male	26+1	Neonatal death	Whole blood	Whole blood	Whole blood
PED178	Trio	Male	25	Termination	Whole blood	Whole blood	Skin
PED179	Trio	Female	19+5	Miscarriage	Saliva	Saliva	Amnio
PED181	Trio	Female	17	Termination	Saliva	Saliva	Fetal Tissue (not specified)
PED183	Trio	Male	13 weeks	Termination	Whole blood	Whole blood	Fetal Tissue (not specified)
PED184	Trio	Male	22	Termination	Saliva	Saliva	Fetal Tissue (not specified)
PED186	Trio	Female	14+	Termination	Whole blood	Whole blood	Fetal Tissue (not specified)
PED187	Trio	Male	21+5	Termination	Saliva	Saliva	Amnio
PED188	Quad	Male	23+3	Termination	Saliva	Saliva	Amnio	Amnio
PED189	Trio	Male	21+1	Termination	Whole blood	Whole blood	Lung
PED190	Trio	Female	22	Termination	Whole blood	Whole blood	Skin
PED191	Trio	Female	27	Stillbirth	Whole blood	Whole blood	Amnio
PED192	Trio	Female	22+6	Termination	Whole blood	Whole blood	Amnio
PED194	Trio	Male	21+2	Stillbirth	Whole blood	Whole blood	Amnio
PED195	Trio	Female	34	Neonatal death	Saliva	Saliva	Fetal Tissue (not specified)
PED196	Quad	Female	22	Termination	Saliva	Saliva	Fetal Tissue (not specified)	Whole blood
PED197	Trio	Female	18+2	Termination	Saliva	Saliva	Lung
PED198	Trio	Female	35+1	Neonatal death	Whole blood	Whole blood	Skin
PED199	Trio	Male	22	Termination	Saliva	Saliva	Fetal Tissue (not specified)
PED200	Trio	Male	24+5	Stillbirth	Whole blood	Whole blood	Cartilage
PED201	Trio	Male	16+3	Termination	Whole blood	Whole blood	Amnio
PED203	Trio	Female	21+5	Termination	Whole blood	Whole blood	Fetal Tissue (not specified)
PED204	Trio	Male	21	Termination	Saliva	Saliva	Chorionic villus
PED205	Trio	Male	15+4	Termination	Whole blood	Whole blood	Fetal Tissue (not specified)
PED206	Trio	Female	22+3	Termination	Saliva	Saliva	Whole blood
PED207	Trio	Male	37	Neonatal death	Whole blood	Whole blood	Skin
PED208	Trio	Male	26	Termination	Saliva	Saliva	Fetal Tissue (not specified)
PED210	Trio	Unknown	23	Termination	Saliva	Saliva	Fetal Tissue (not specified)
PED211	Trio	Female	20+0	Stillbirth	Whole blood	Whole blood	Skin fibroblasts
PED214	Trio	Male	32+5	Termination	Saliva	Saliva	Umbilical Cord
PED215	Trio	Female	19+3	Termination	Whole blood	Whole blood	Amnio
PED216	Trio	Female	22	Termination	Whole blood	Whole blood	Fetal Tissue (not specified)
PED217	Trio	Female	23	Termination	Whole blood	Whole blood	Skin
PED219	Trio	Female	21+5	Stillbirth	Saliva	Saliva	Fetal Tissue (not specified)
PED221	Trio	Female	36	Neonatal death	Saliva	Saliva	Fetal Tissue (not specified)
PED222	Trio	Female	14+2	Termination	Whole blood	Whole blood	Skin fibroblasts
PED225	Trio	Female	38	Neonatal death	Saliva	Saliva	Whole blood
PED226	Trio	Male	19+2	Termination	Whole blood	Whole blood	Lung
PED227	Trio	Male	22	Termination	Whole blood	Whole blood	Lung
PED228	Trio	Male	23	Termination	Whole blood	Whole blood	Skin
PED229	Trio	Female	19+5	Termination	Saliva	Saliva	Fetal Tissue (not specified)
PED230	Trio	Male	22	Termination	Whole blood	Whole blood	Fetal Tissue (not specified)
PED231	Trio	Female	26+4	Termination	Saliva	Saliva	Fetal Tissue (not specified)
PED233	Trio	Female	24	Termination	Whole blood	Whole blood	Skin
PED234	Trio	Male	34+4	Stillbirth	Saliva	Saliva	Fetal Tissue (not specified)
PED235	Trio	Female	20+6	Termination	Whole blood	Whole blood	Lung
PED236	Trio	Male	27+2	Termination	Saliva	Saliva	Fetal Tissue (not specified)
PED239	Trio	Female	34+0	Termination	Saliva	Saliva	Whole blood
PED240	Trio	Male	15+0	Termination	Whole blood	Whole blood	Fetal Tissue (not specified)
PED242	Trio	Female	34+2	Termination	Whole blood	Whole blood	Lung
